# Supplementary material for: New method for the identification of arbuscular mycorrhizal fungi by proteomic-based biotyping of spores using MALDI-TOF-MS
Source: PubMed Central journal article supplement (PMC5662746; doi:10.1038/s41598-017-14487-6), 2017-10-30
Supplement: 41598_2017_14487_MOESM1_ESM.pdf [file 41598_2017_14487_MOESM1_ESM.pdf]

1 *Supplementary Information*

2 **New method for the identification of arbuscular**  
3 **mycorrhizal fungi by proteomic-based biotyping of spores**  
4 **using MALDI-TOF-MS**

5

6 **Thomas Crossay<sup>1</sup>, Cyril Antheaume<sup>1,2,\*</sup>, Dirk Redecker<sup>3</sup>, Lucie Bon<sup>1</sup>, Nicolas Chedri<sup>4</sup>, Clément Richert<sup>5</sup>,**  
7 **Linda Guentas<sup>1</sup>, Yvon Cavaloc<sup>1</sup>, Hamid Amir<sup>1,\*</sup>**

8

9 <sup>1</sup> *Institut des Sciences Exactes et Appliquées (EA 7484), Université de Nouvelle-Calédonie, BP R4, 98851*  
10 *Nouméa, New-Caledonia*

11 <sup>2</sup> *Plate-forme d'Analyse Chimique Strasbourg-Illkirch. Université de Strasbourg, F-67400 Illkirch, France*

12 <sup>3</sup> *Agroécologie, AgroSup Dijon, CNRS, INRA, Univ. Bourgogne Franche-Comté, F-21000 Dijon, France*

13 <sup>4</sup> *Institut Pasteur, Bacteriology Research Unit, 98800 Nouméa, New-Caledonia*

14 <sup>5</sup> *Bruker Corporation, France – New-Caledonia*

15

16 \*Corresponding authors: hamid.amir@univ-nc.nc, cyril.antheaume@gmail.com

17

18 Tel: +(687) 290241

19 # Current address: Université de Nouvelle-Calédonie, BP R4, 98851 Nouméa Cédex, Nouvelle-Calédonie

| Isolates                                   | Origin         | Diameter of spore $\mu\text{m}$ | Approximate volume of 1 spore $\mu\text{m}^3$ | Nb spores per sample |
|--------------------------------------------|----------------|---------------------------------|-----------------------------------------------|----------------------|
| <i>Gigaspora rosea</i> BEG 9               | United States  | 250                             | 8175040                                       | 1                    |
| <i>Gigaspora margarita</i> BEG 34          | New Zealand    | 300                             | 14126470                                      | 1                    |
| <i>Gigaspora candida</i> BEG 17            | Taiwan         | 230                             | 6365800                                       | 1                    |
| <i>Scutellospora calospora</i> BEG 32      | England        | 115                             | 795730                                        | 3                    |
| <i>Rhizophagus clarus</i> BEG 248          | Brazil         | 150                             | 1765810                                       | 1                    |
| <i>Rhizophagus clarus</i> BEG 149          | China          | 150                             | 1765810                                       | 1                    |
| <i>Rhizophagus clarus</i> BEG 142          | Brazil         | 150                             | 1765810                                       | 1                    |
| <i>Funneliformis mosseae</i> BEG 12        | England        | 110                             | 696380                                        | 4                    |
| <i>Funneliformis coronatum</i> BEG 22      | Australia      | 150                             | 1765810                                       | 1                    |
| <i>Claroideoglossum etunicatum</i> BEG 247 | Brazil         | 85                              | 321310                                        | 7                    |
| <i>Claroideoglossum claroideum</i> BEG 31  | Finland        | 100                             | 523200                                        | 4                    |
| <i>Claroideoglossum claroideum</i> BEG 14  | Denmark        | 105                             | 605672                                        | 4                    |
| <i>Claroideoglossum claroideum</i> BEG 23  | Czech Republic | 100                             | 523200                                        | 4                    |
| <i>Scutellospora ovalis</i>                | New Caledonia  | 100/219                         | 1135350                                       | 2                    |
| <i>Acaulospora saccata</i>                 | New Caledonia  | 75                              | 220730                                        | 10                   |
| <i>Acaulospora fragilissima</i>            | New Caledonia  | 67                              | 157360                                        | 14                   |
| <i>Rhizophagus neocaledonicus</i>          | New Caledonia  | 75                              | 220730                                        | 10                   |
| <i>Claroideoglossum etunicatum</i> nc      | New Caledonia  | 92,5                            | 414090                                        | 6                    |
| <i>Pervetustus simplex</i> nc              | New Caledonia  | 53                              | 77890                                         | 29                   |

21 **Supplementary Table 1.** Species used, their origin, measured spore diameter (n=100),  
 22 calculated volume of spores required for proteomic analysis, number of spores used per sample  
 23 for proteomic analysis. New-Caledonian isolates were provided by the Laboratoire Insulaire du  
 24 Vivant et de l'Environnement (LIVE), other isolates were provided by International Bank for  
 25 the Glomeromycota (IBG).

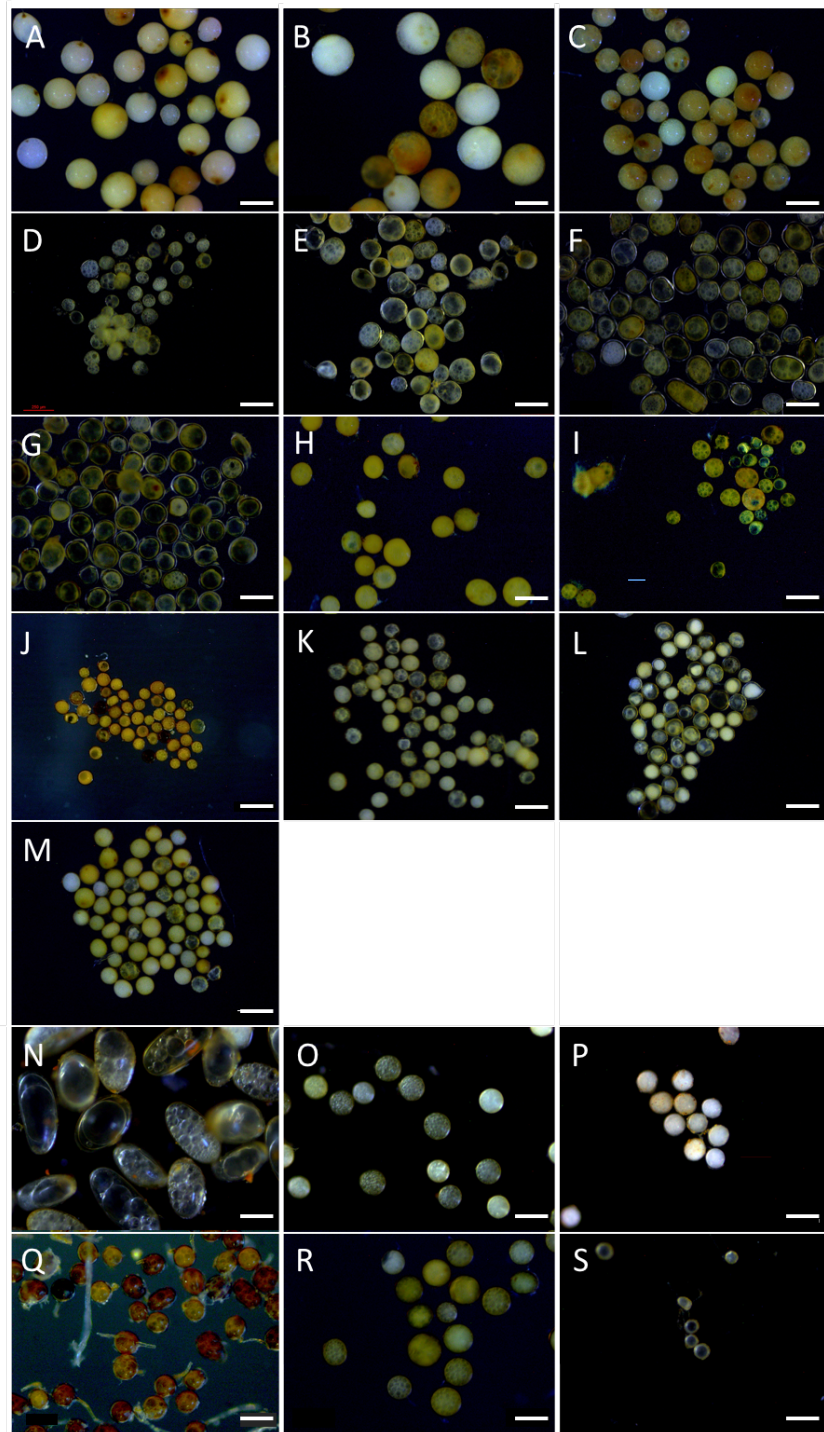

27

28 **Supplementary Figure 1.** Intact spores of studied isolates. A. *Gigaspora rosea* BEG9; B.  
 29 *Gigaspora margarita* BEG34; C. *Gigaspora candida* BEG17; D. *Scutellospora calospora*  
 30 BEG32; E. *Rhizophagus clarus* BEG248; F. *Rhizophagus clarus* BEG149; G. *Rhizophagus*  
 31 *clarus* BEG142; H. *Funneliformis coronatum* BEG22; I. *Funneliformis mosseae* BEG12; J.  
 32 *Claroideoglomus etunicatum* BEG247; K. *Claroideoglomus claroideum* BEG31; L.  
 33 *Claroideoglomus claroideum* BEG14; M. *Claroideoglomus claroideum* BEG23. N.  
 34 *Scutellospora ovalis*; O. *Acaulospora saccata*; P. *Acaulospora fragilissima*; Q. *Rhizophagus*  
 35 *neocaledonicus*; R. *Claroideoglomus etunicatum nc*; S. *Pervetustus simplex nc*. A-M scale bars  
 36 = 250 μm; N-S scale bars = 100 μm.

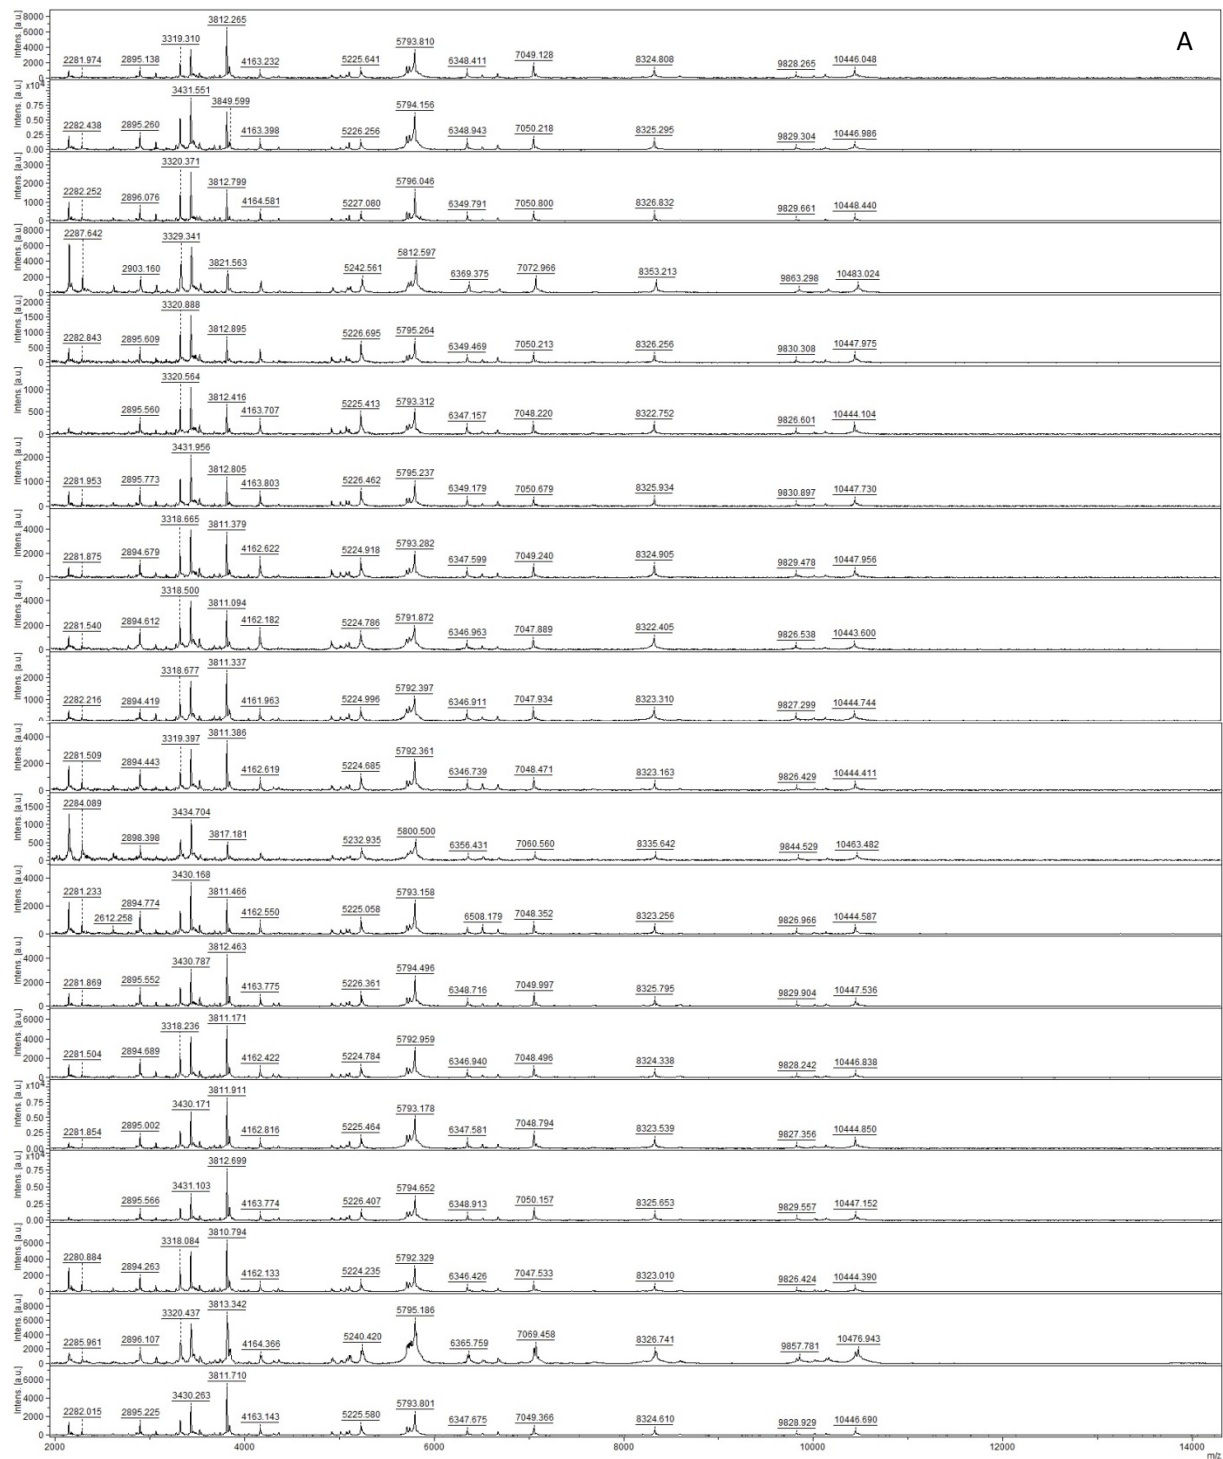

**Supplementary Figure 2A. *Gigaspora rosea* BEG9**

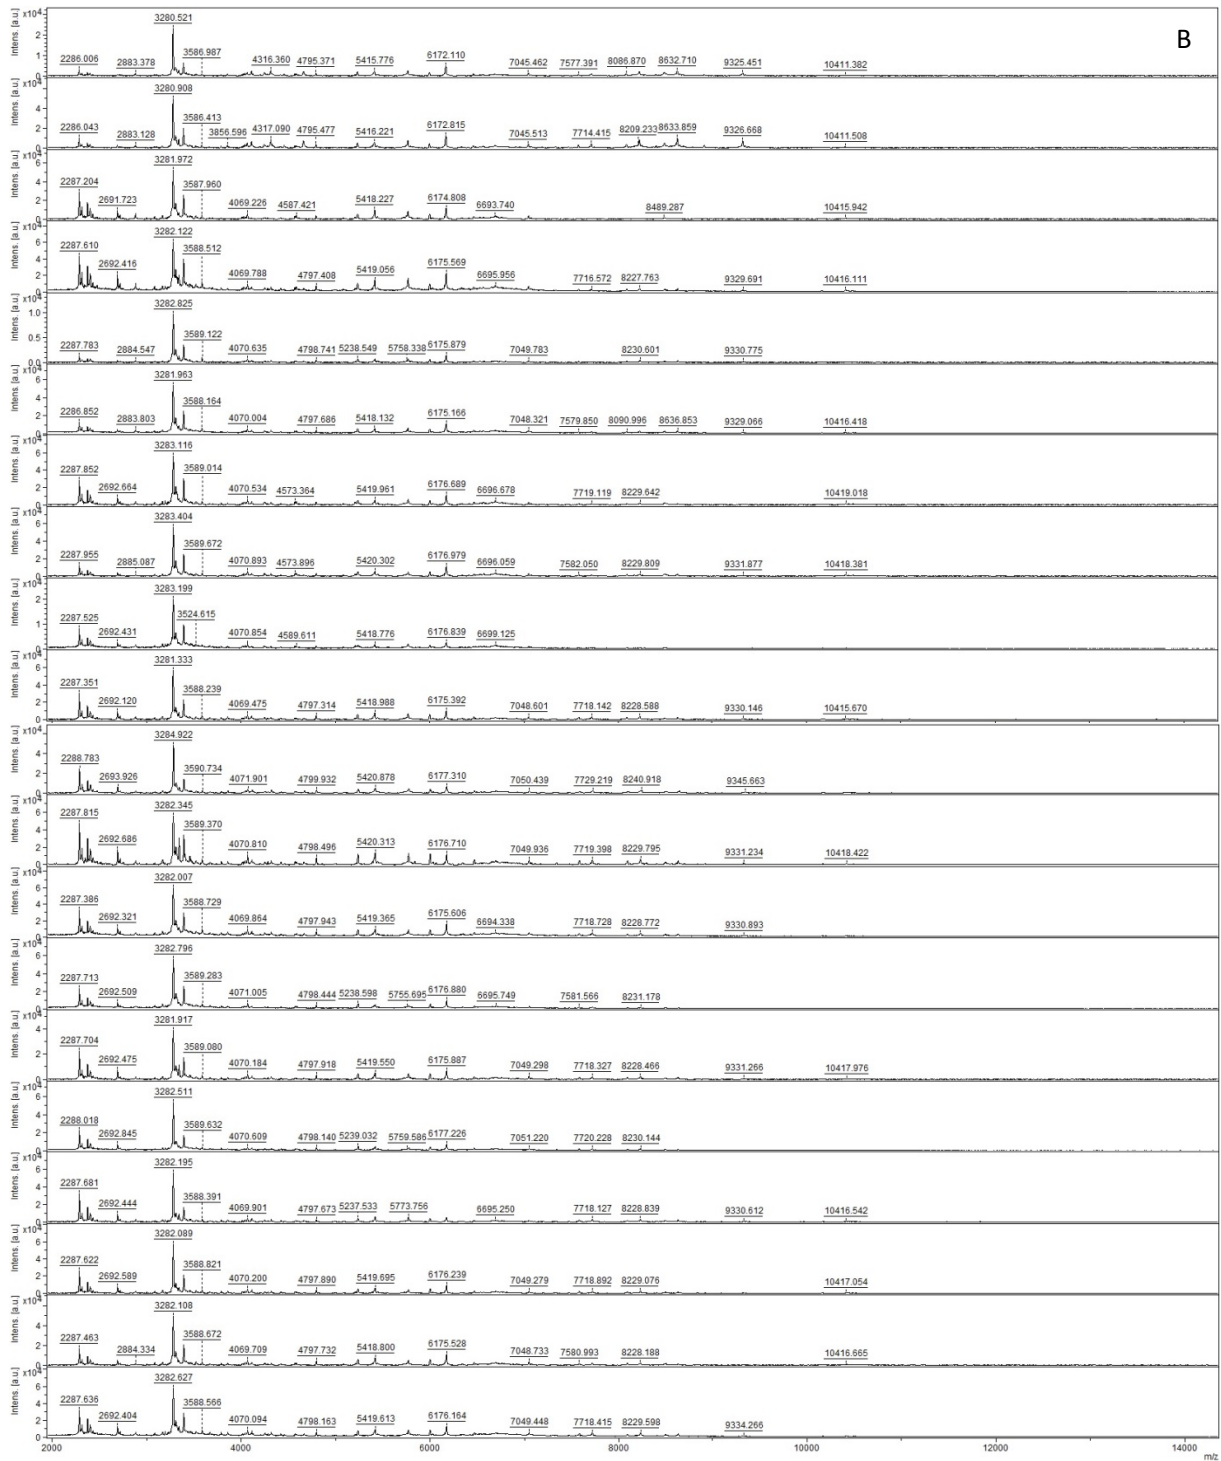

Supplementary Figure 2B. *Gigaspora margarita* BEG34

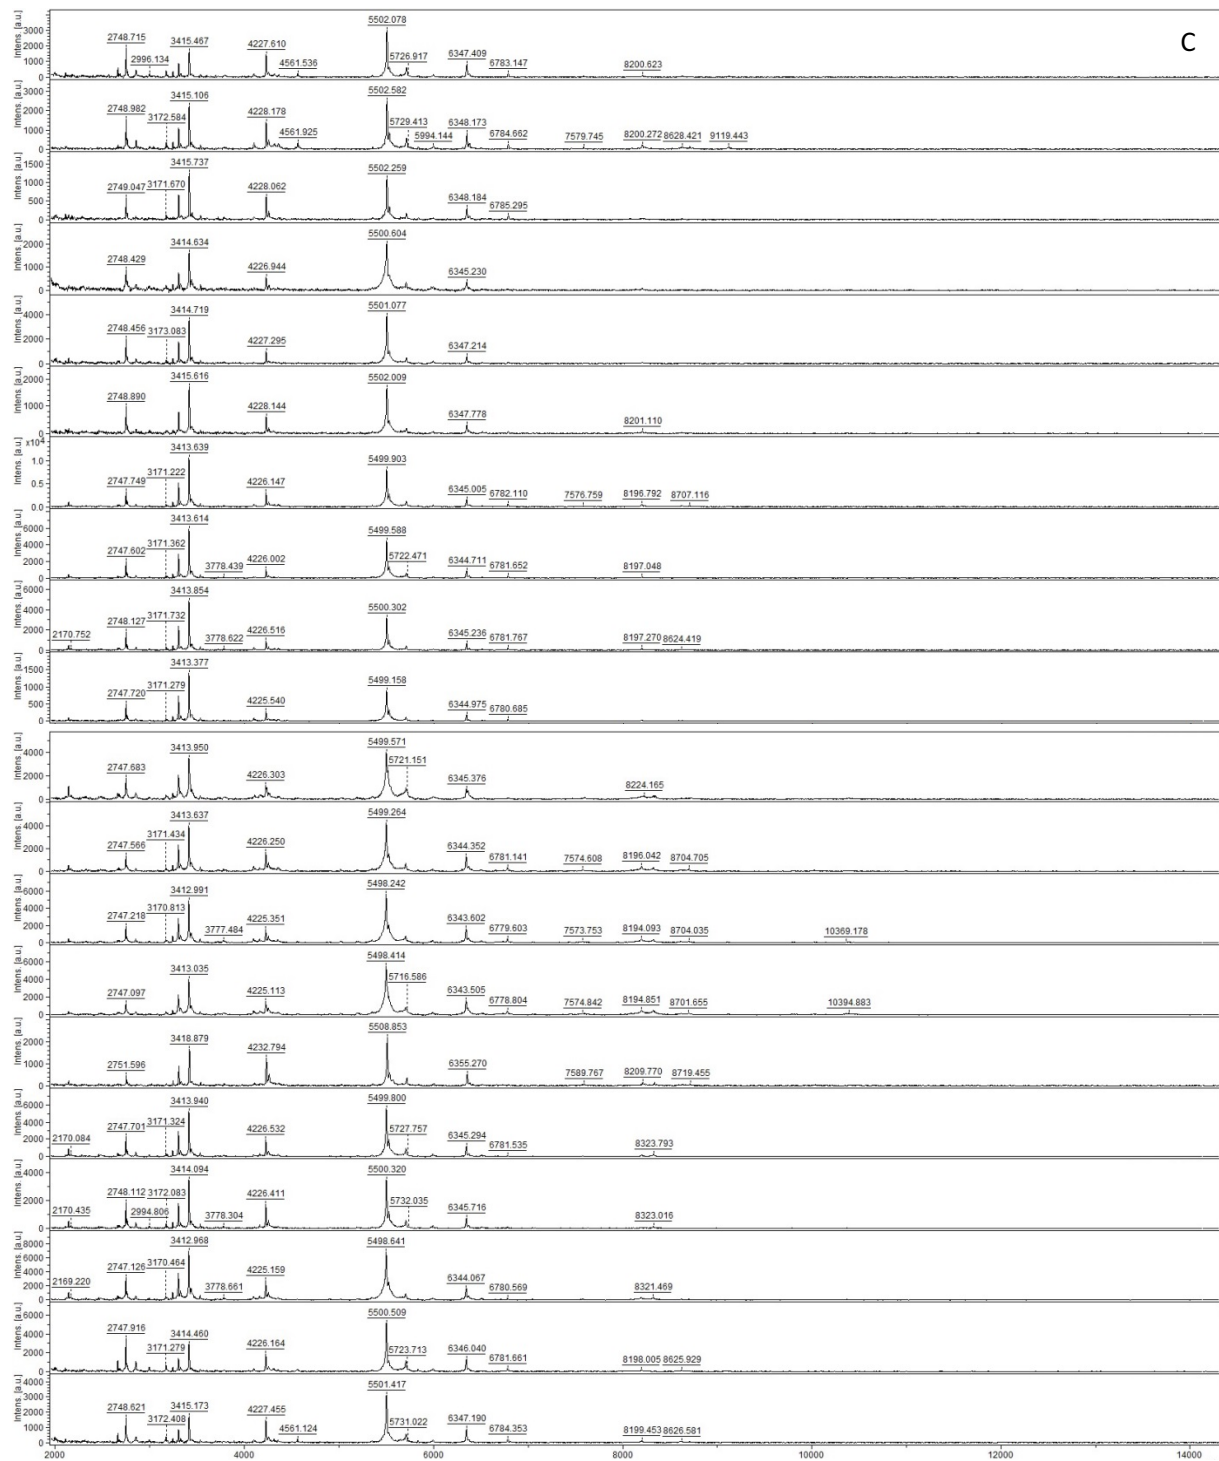

Supplementary Figure 2C. *Gigaspora candida* BEG17

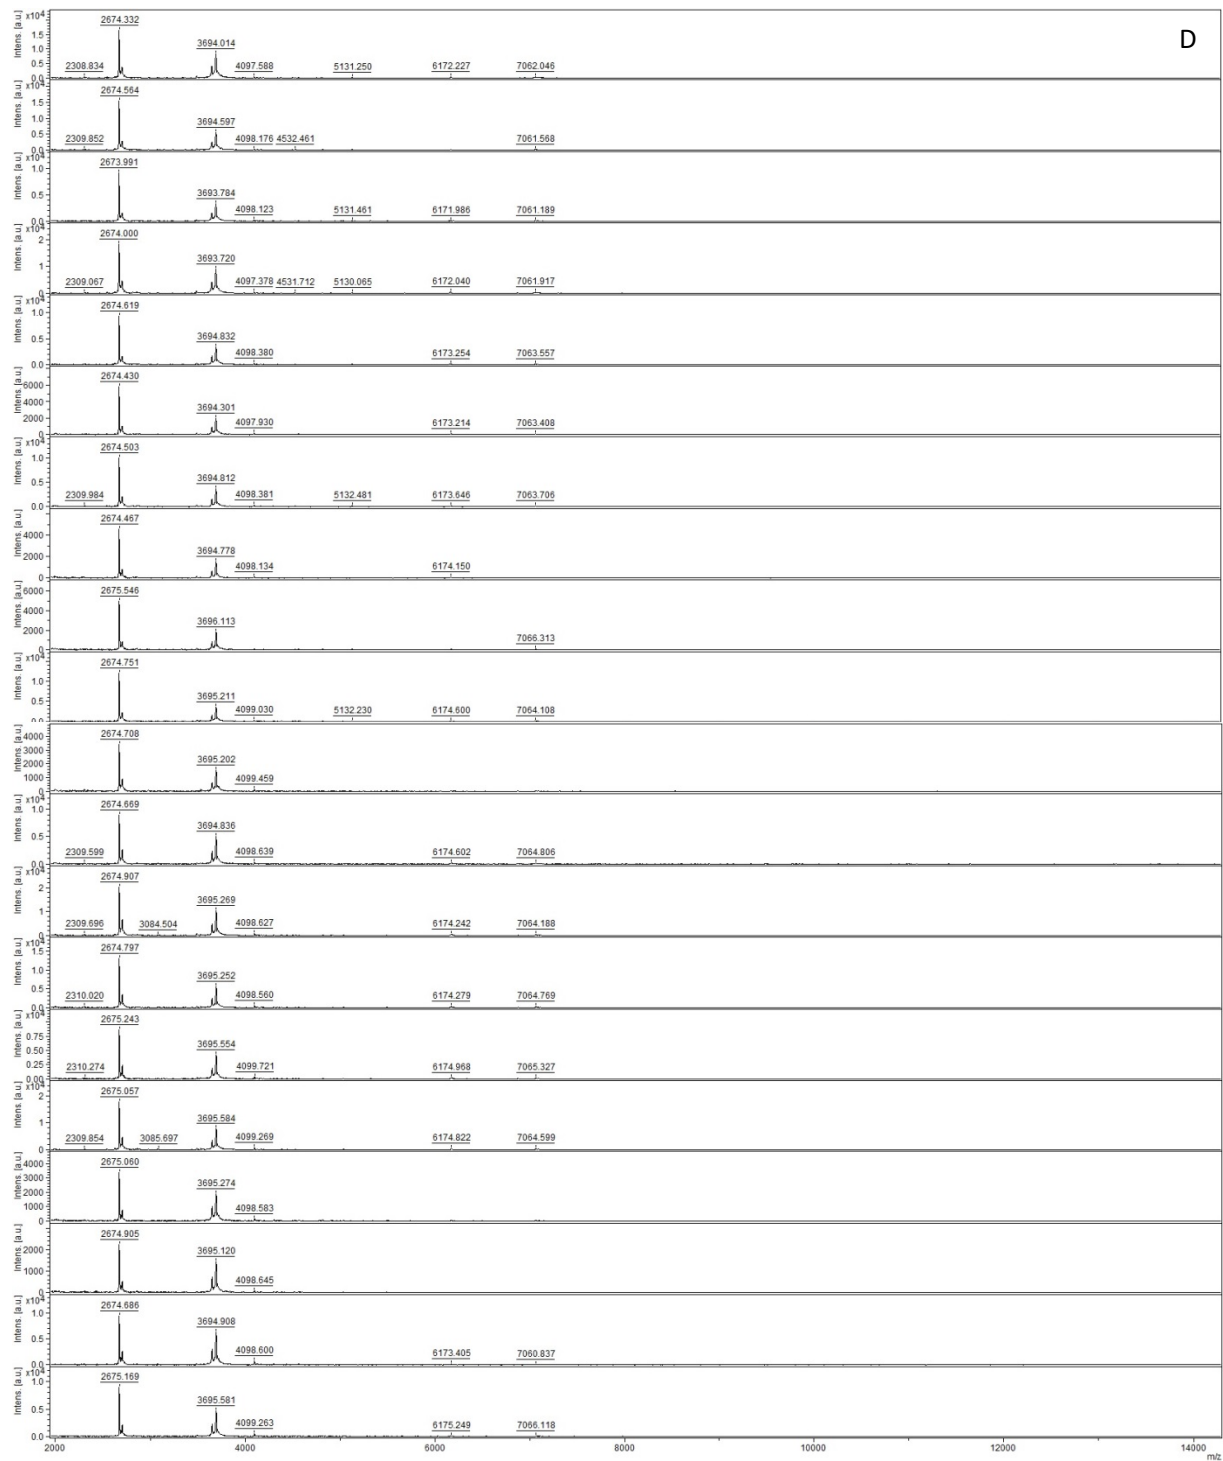

**Supplementary Figure 2D.** *Scutellospora calospora* BEG32

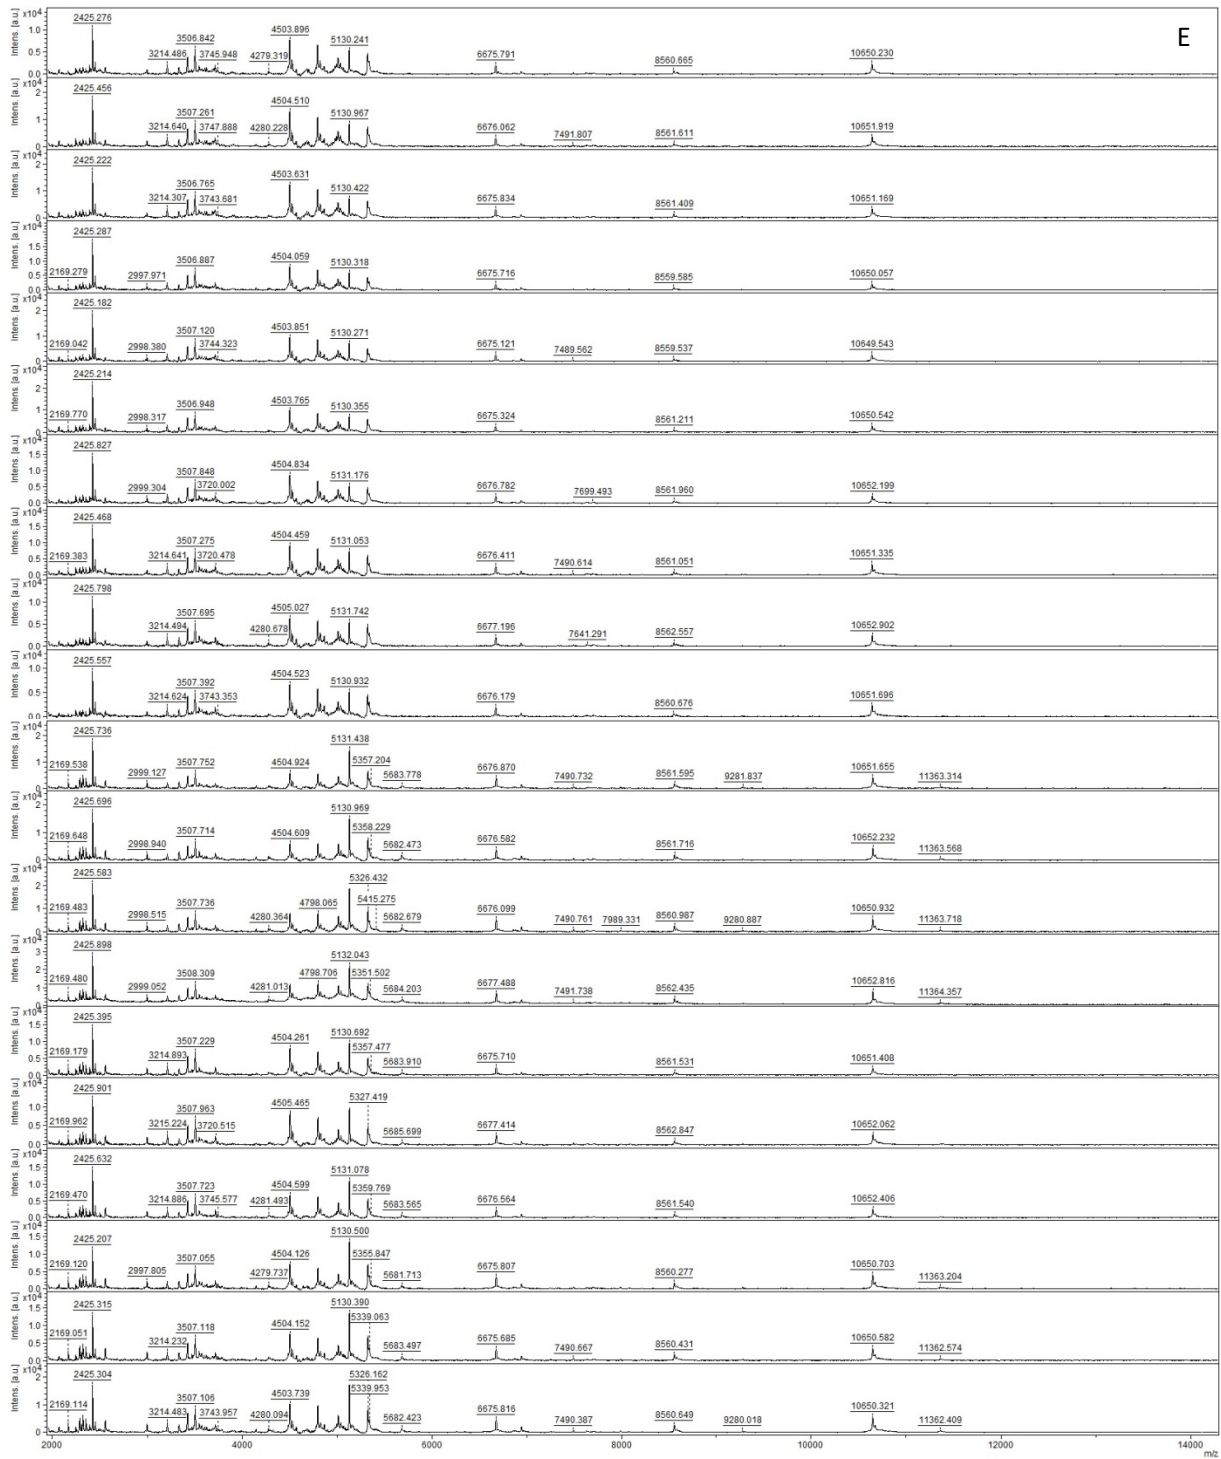

Supplementary Figure 2E. *Rhizophagus clarus* BEG248



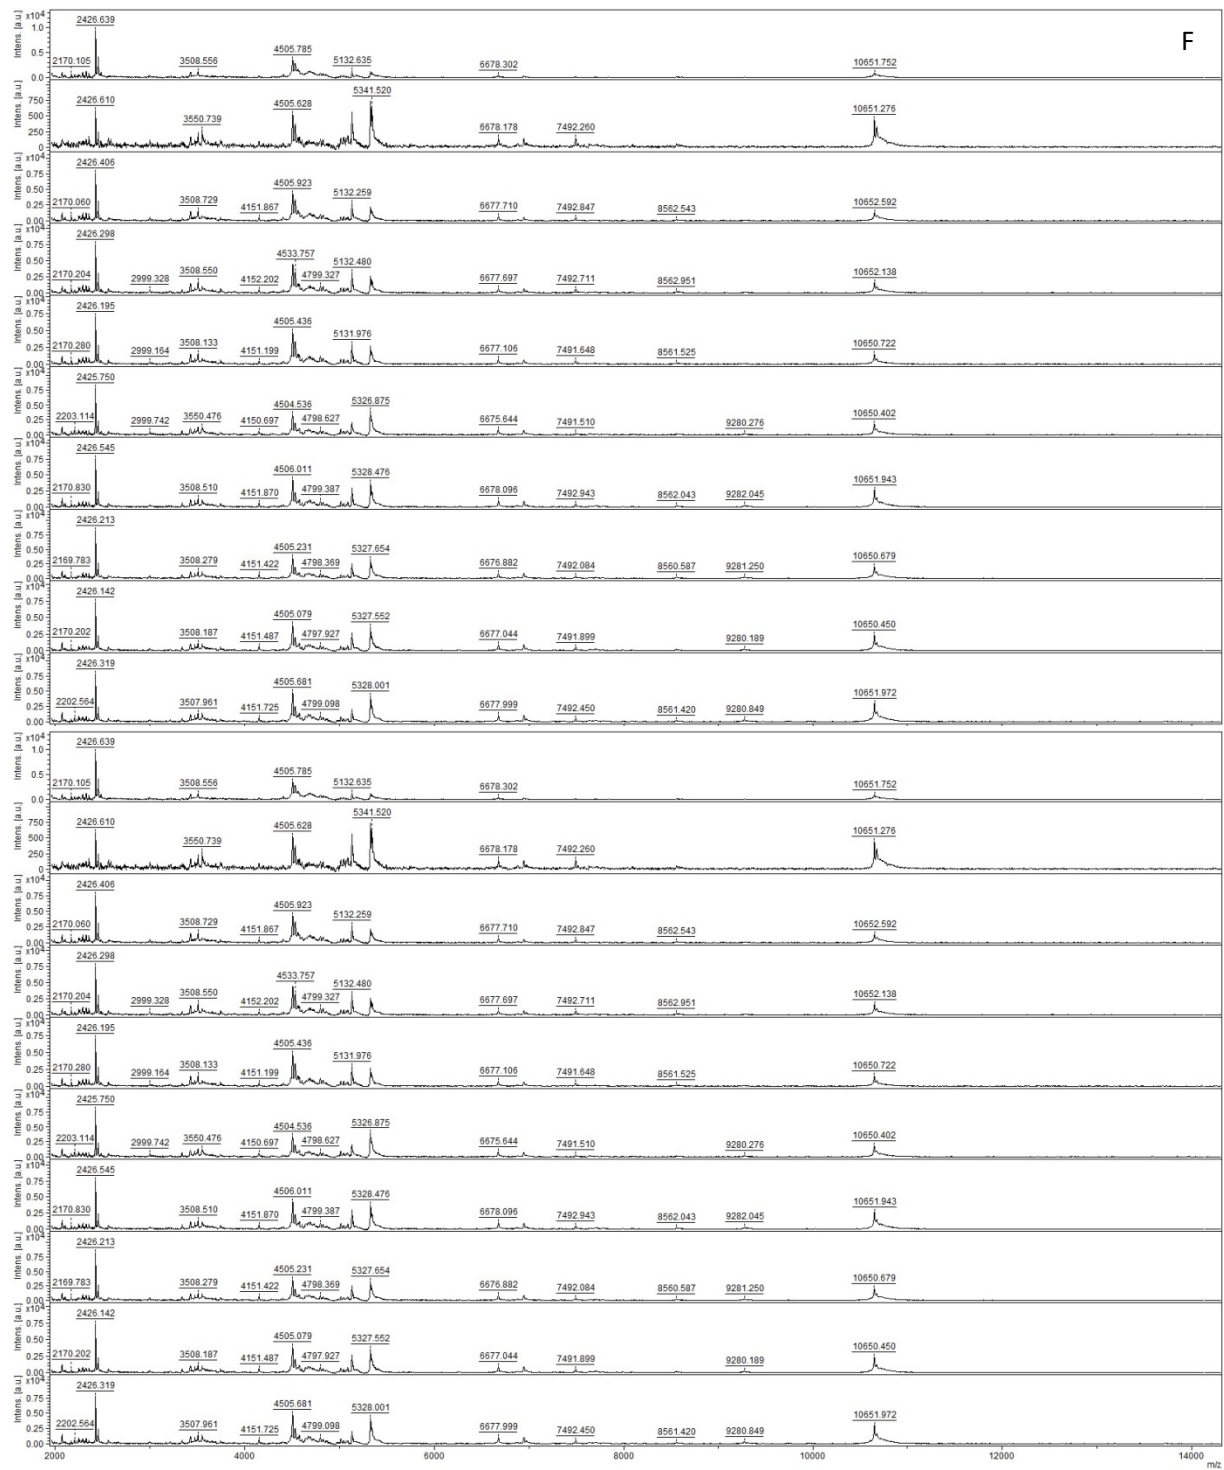

Supplementary Figure 2F. *Rhizophagus clarus* BEG149

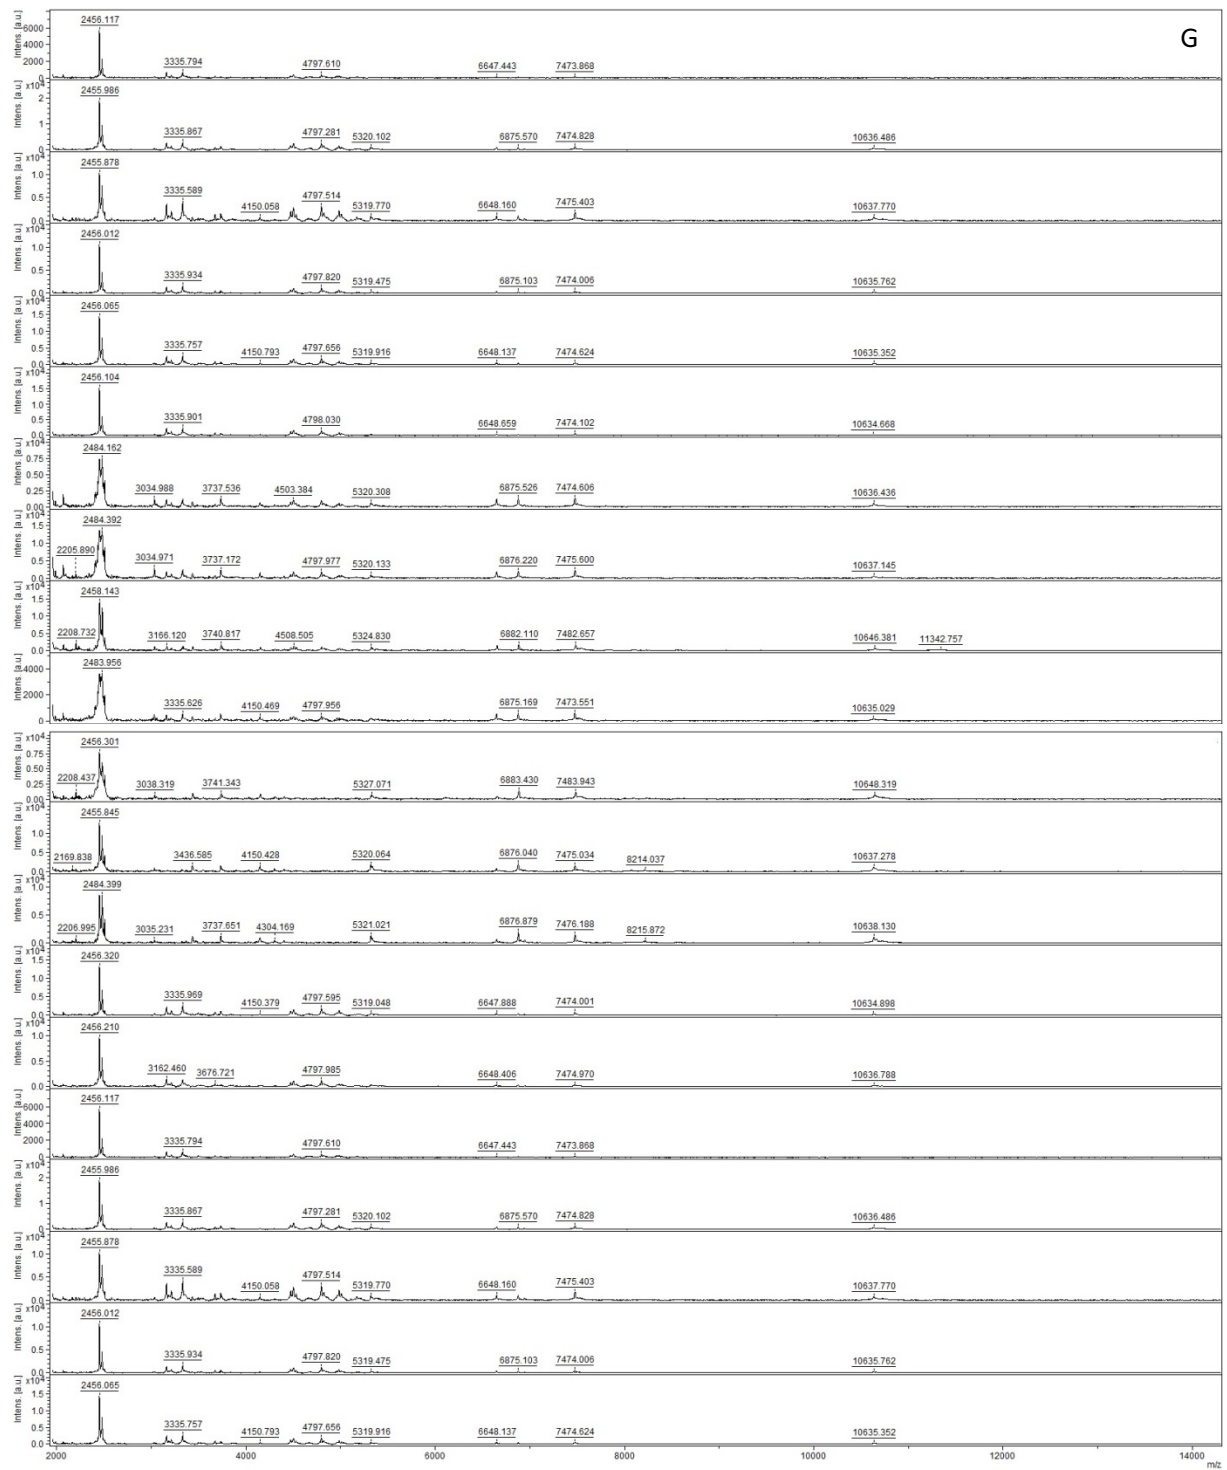

Supplementary Figure 2G. *Rhizopus clarus* BEG142

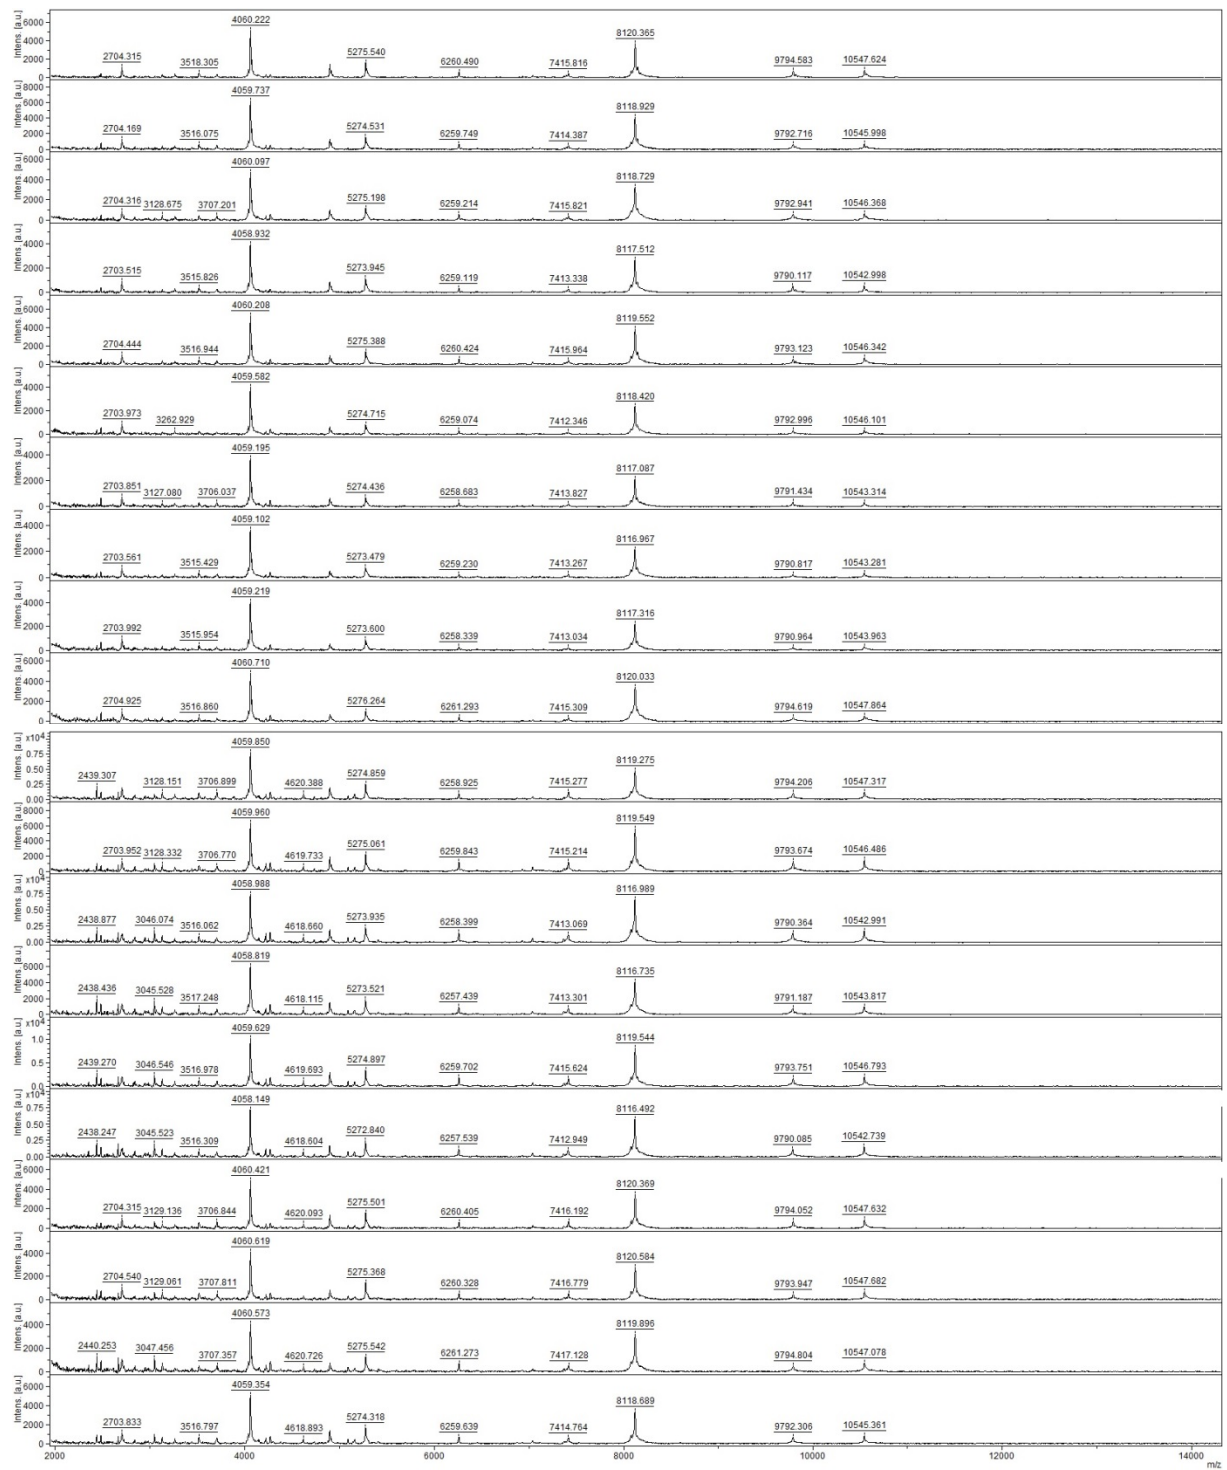

**Supplementary Figure 2H.** *Funneliformis coronatum* BEG22

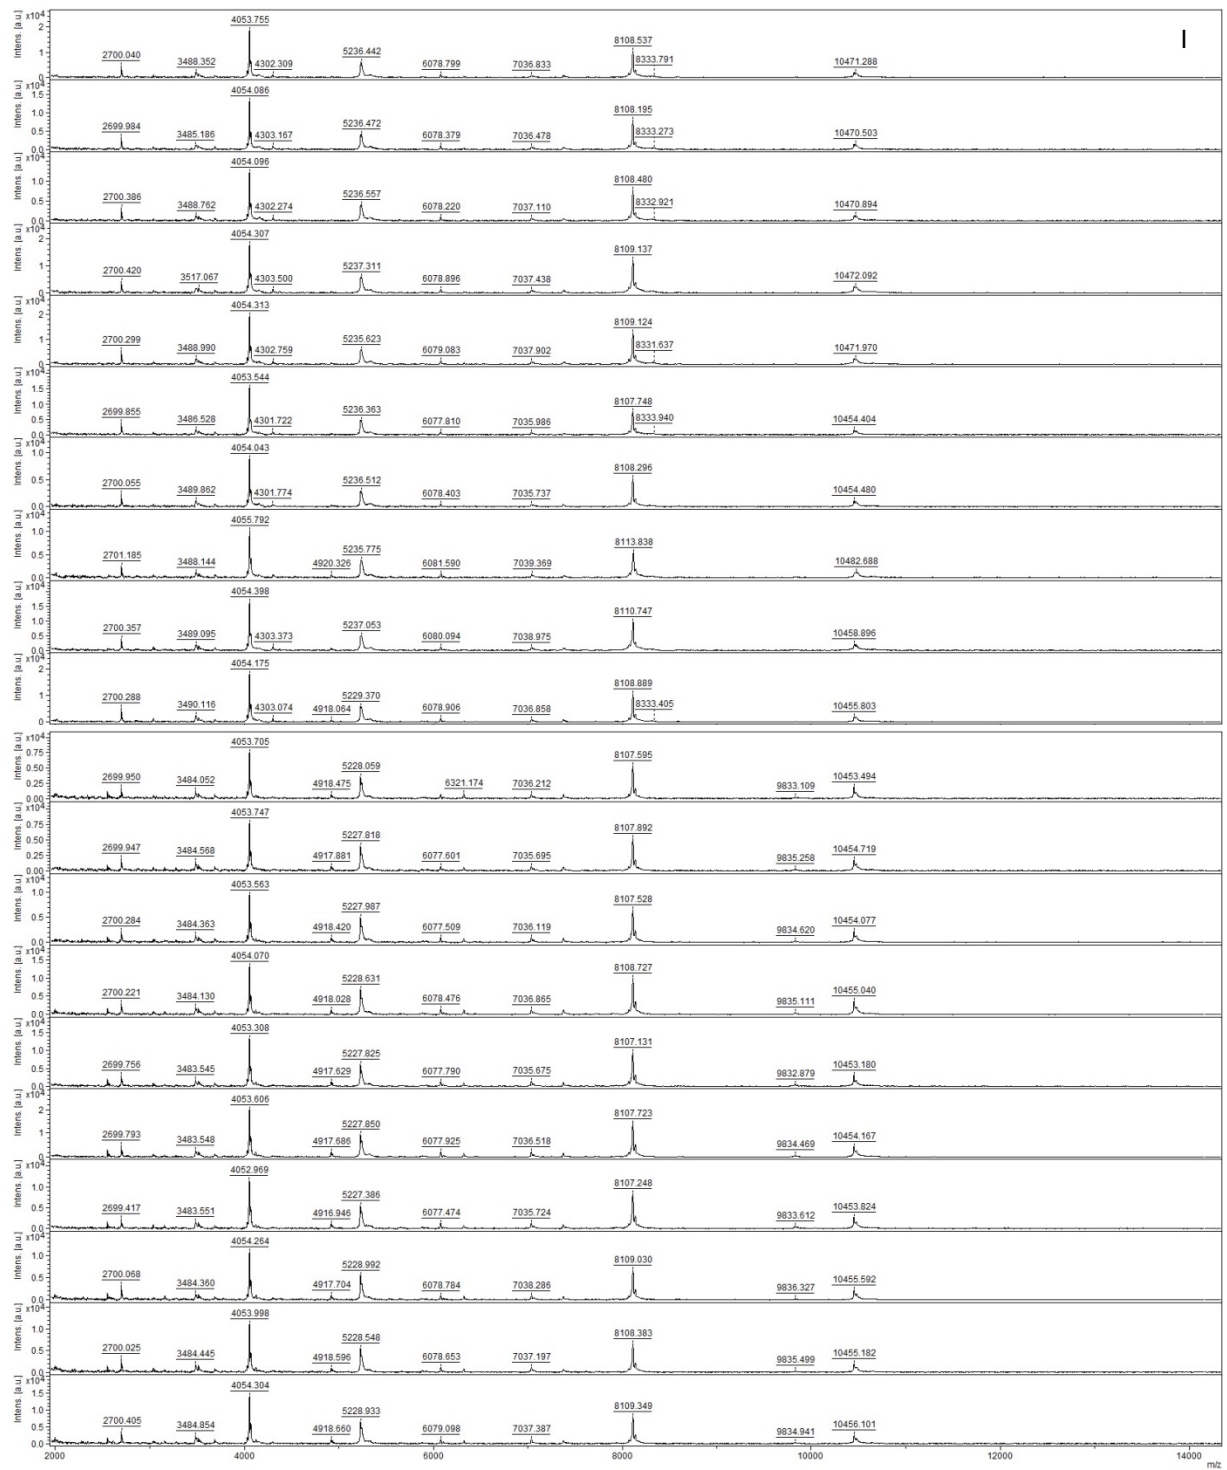

**Supplementary Figure 2I.** *Funneliformis mosseae* BEG12

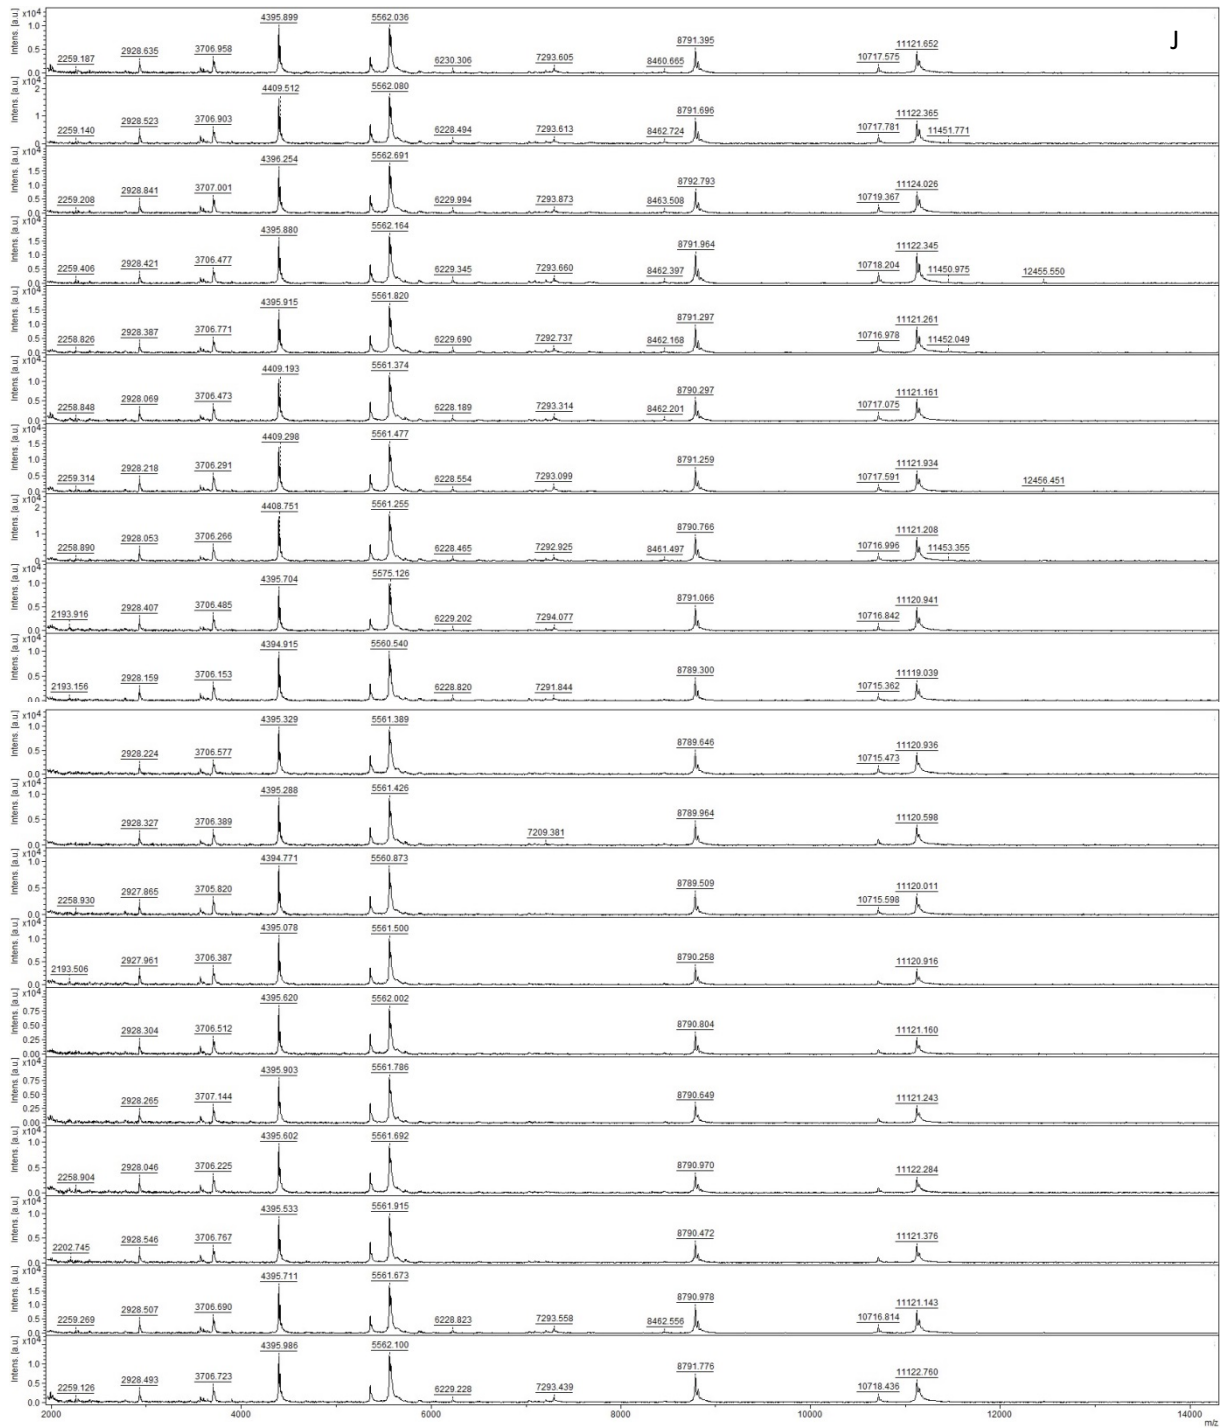

Supplementary Figure 2J. *Claroideoglossus etunicatum* BEG247

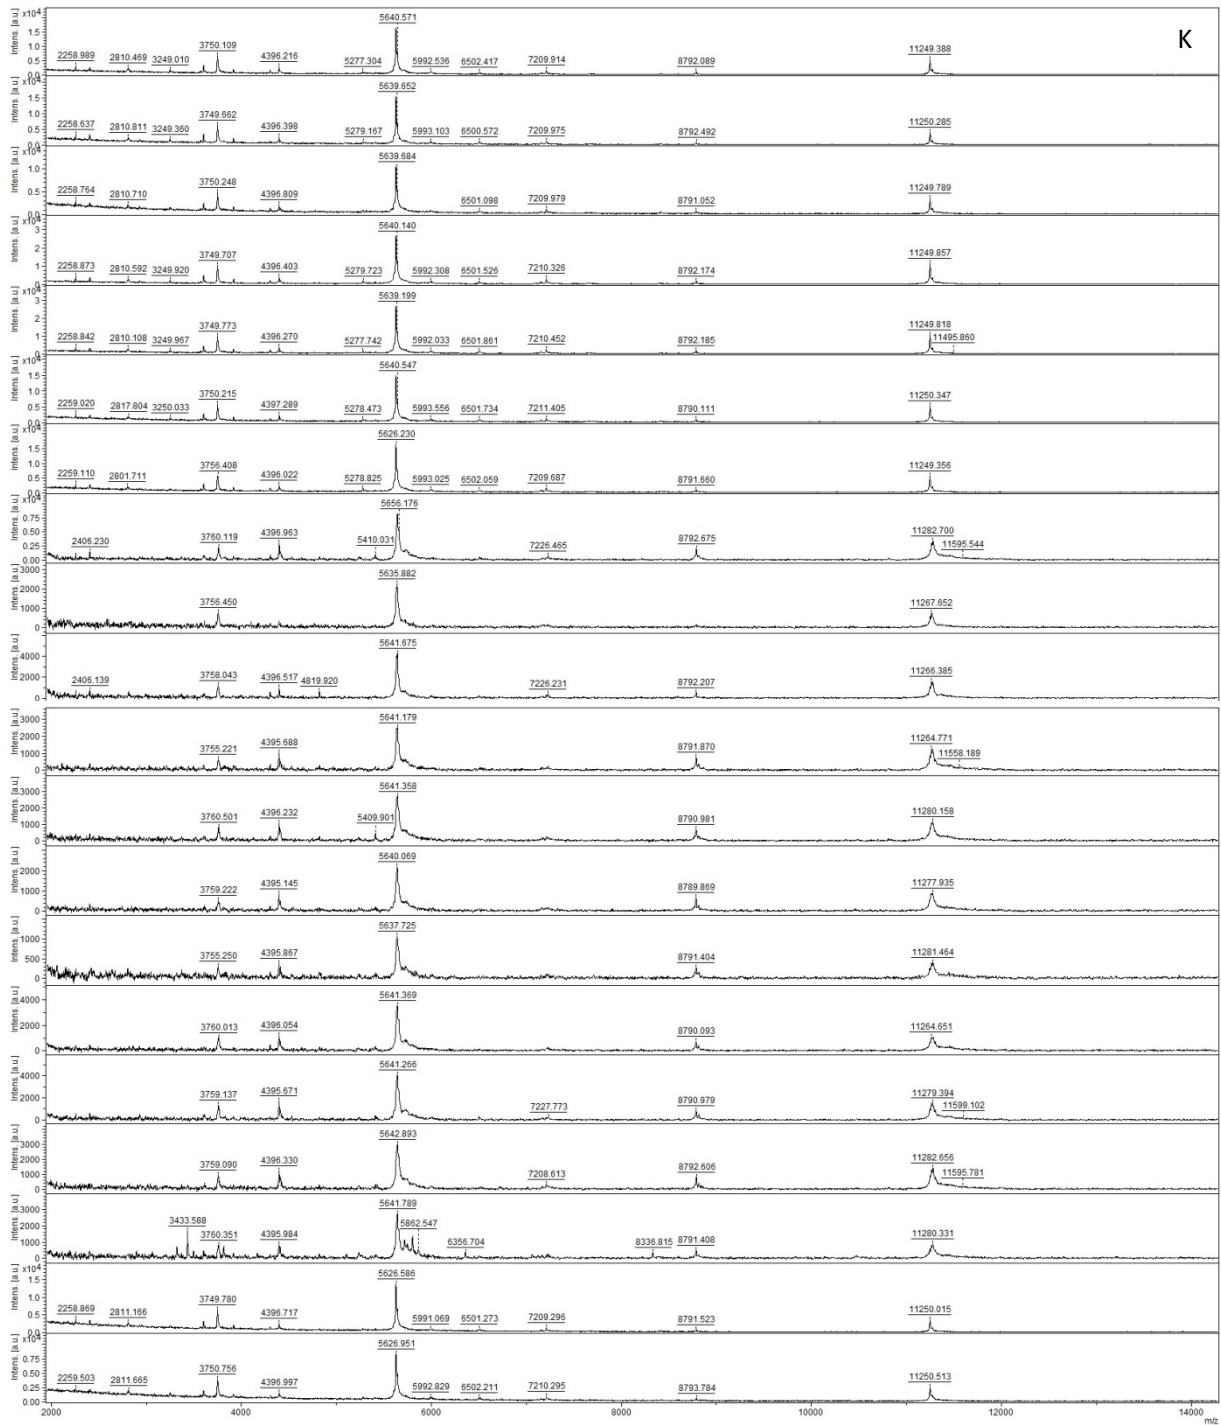

Supplementary Figure 2K. *Clarioideoglomus clarioideum* BEG31

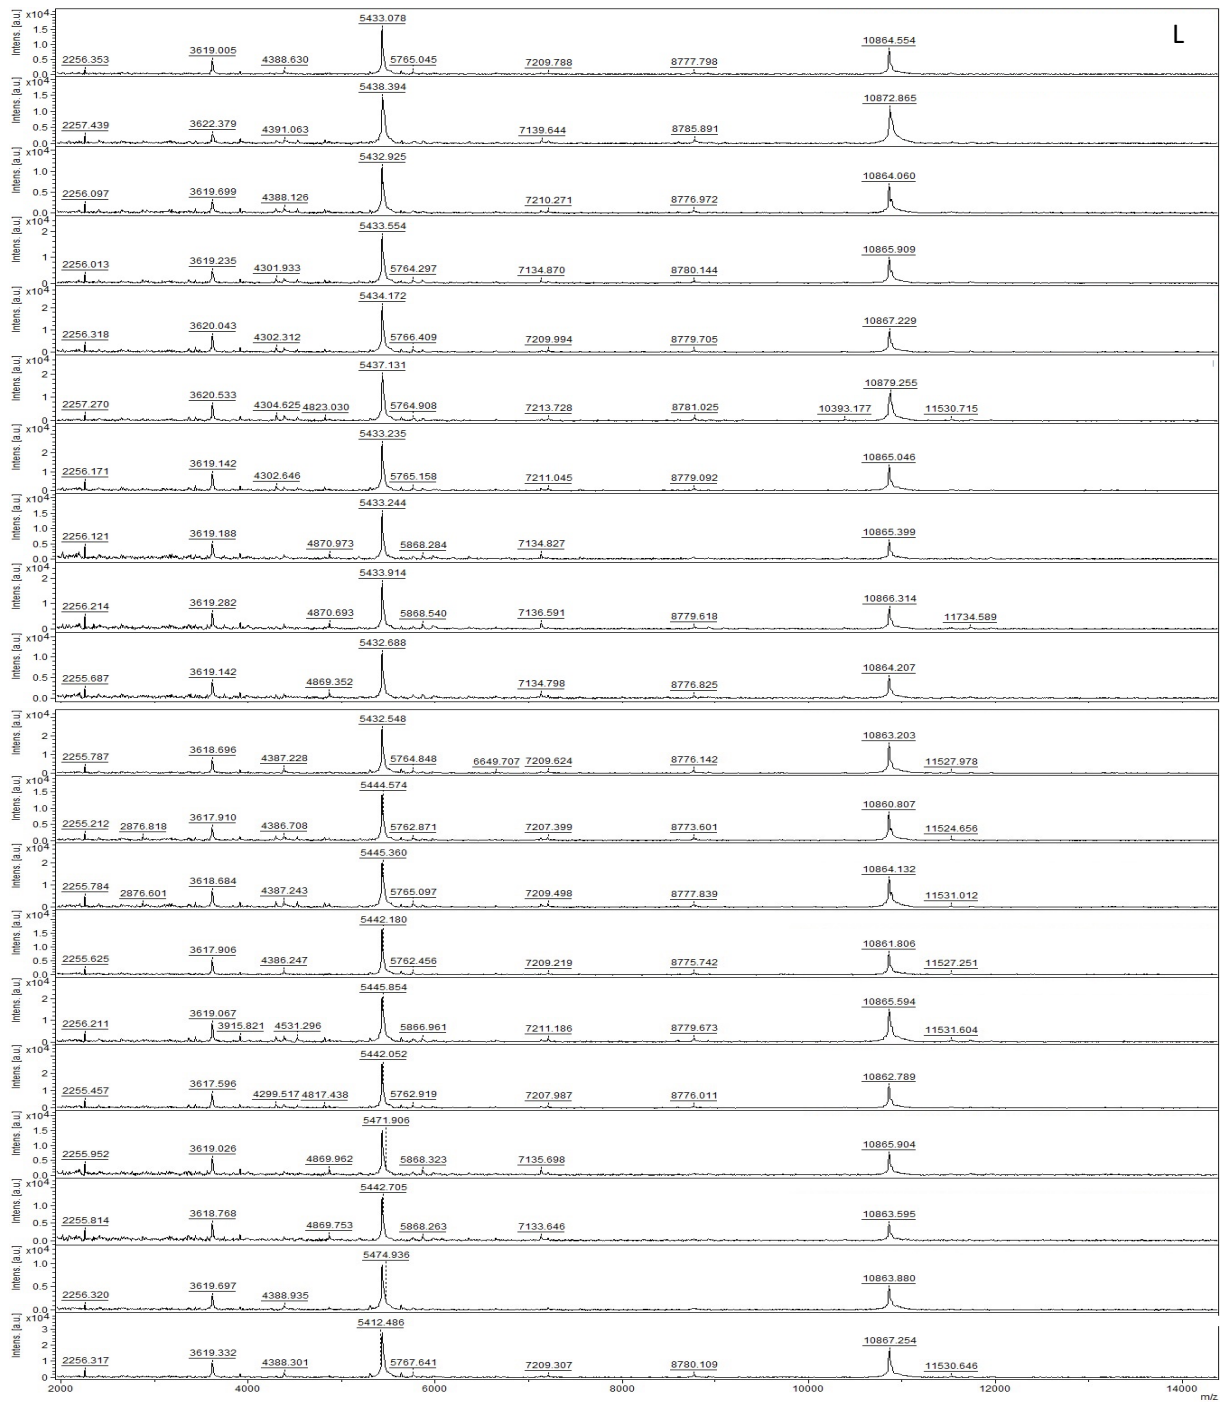

Supplementary Figure 2L. *Clarioideoglomerum clarioideum* BEG14

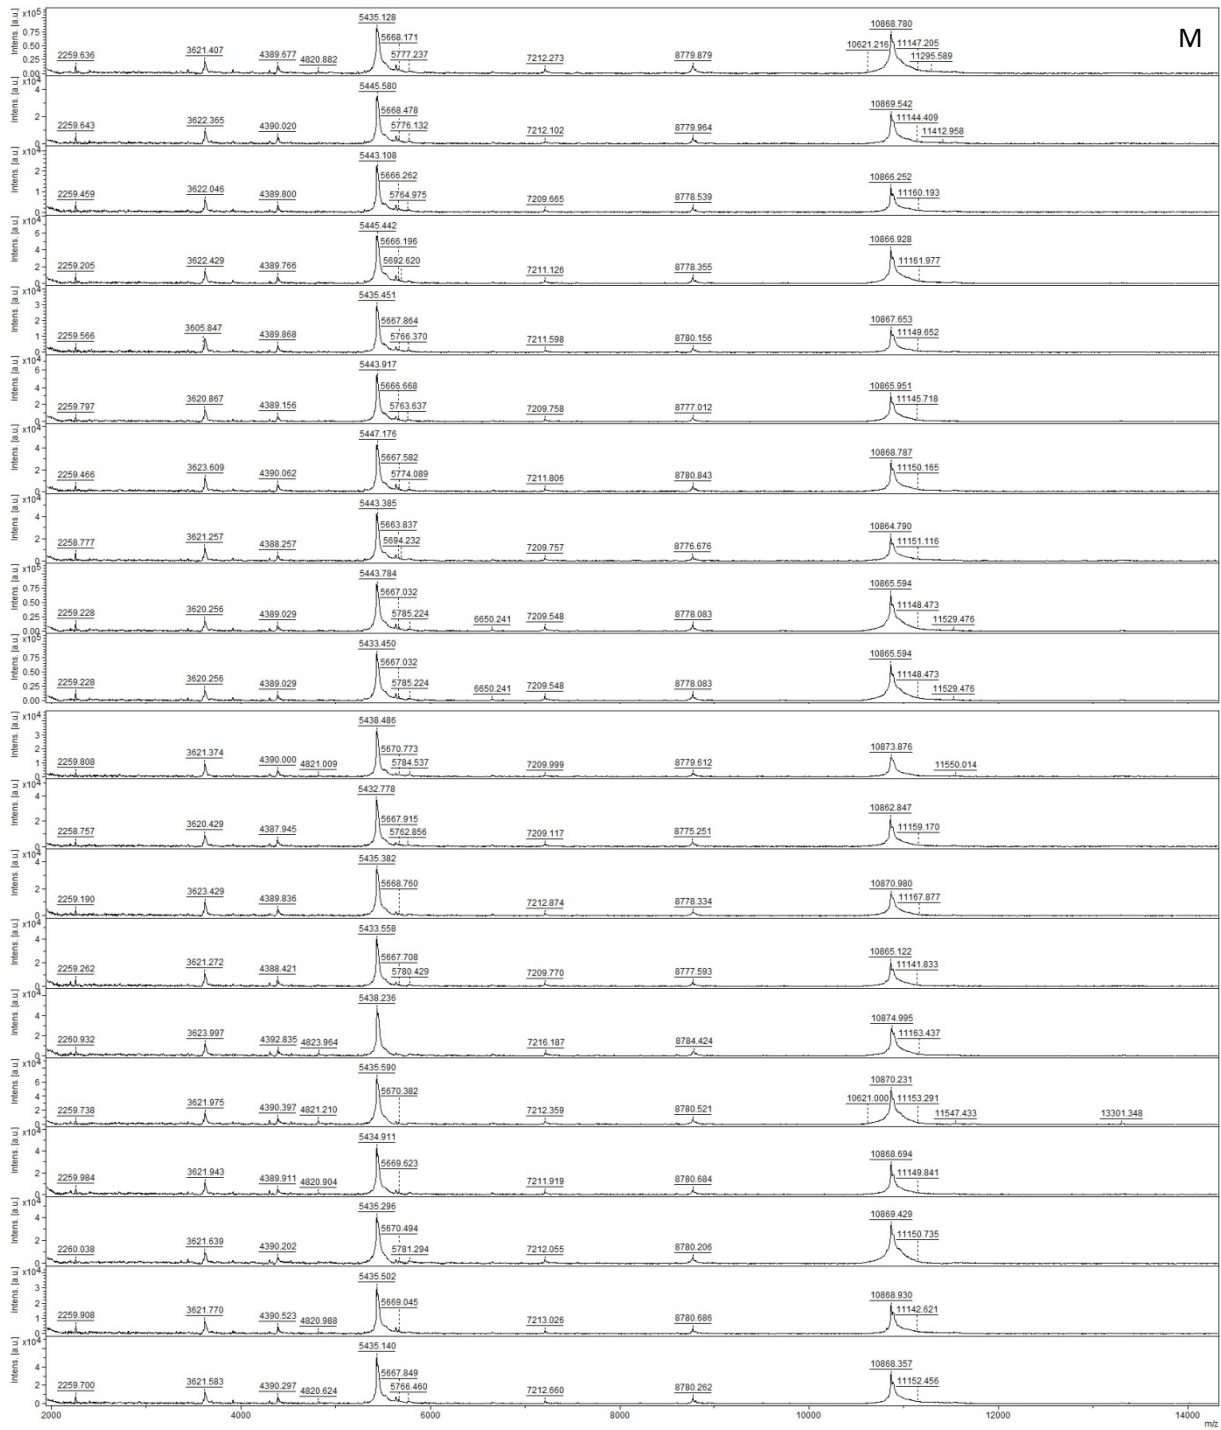

Supplementary Figure 2M. *Clarioideoglomus clarioideum* BEG23



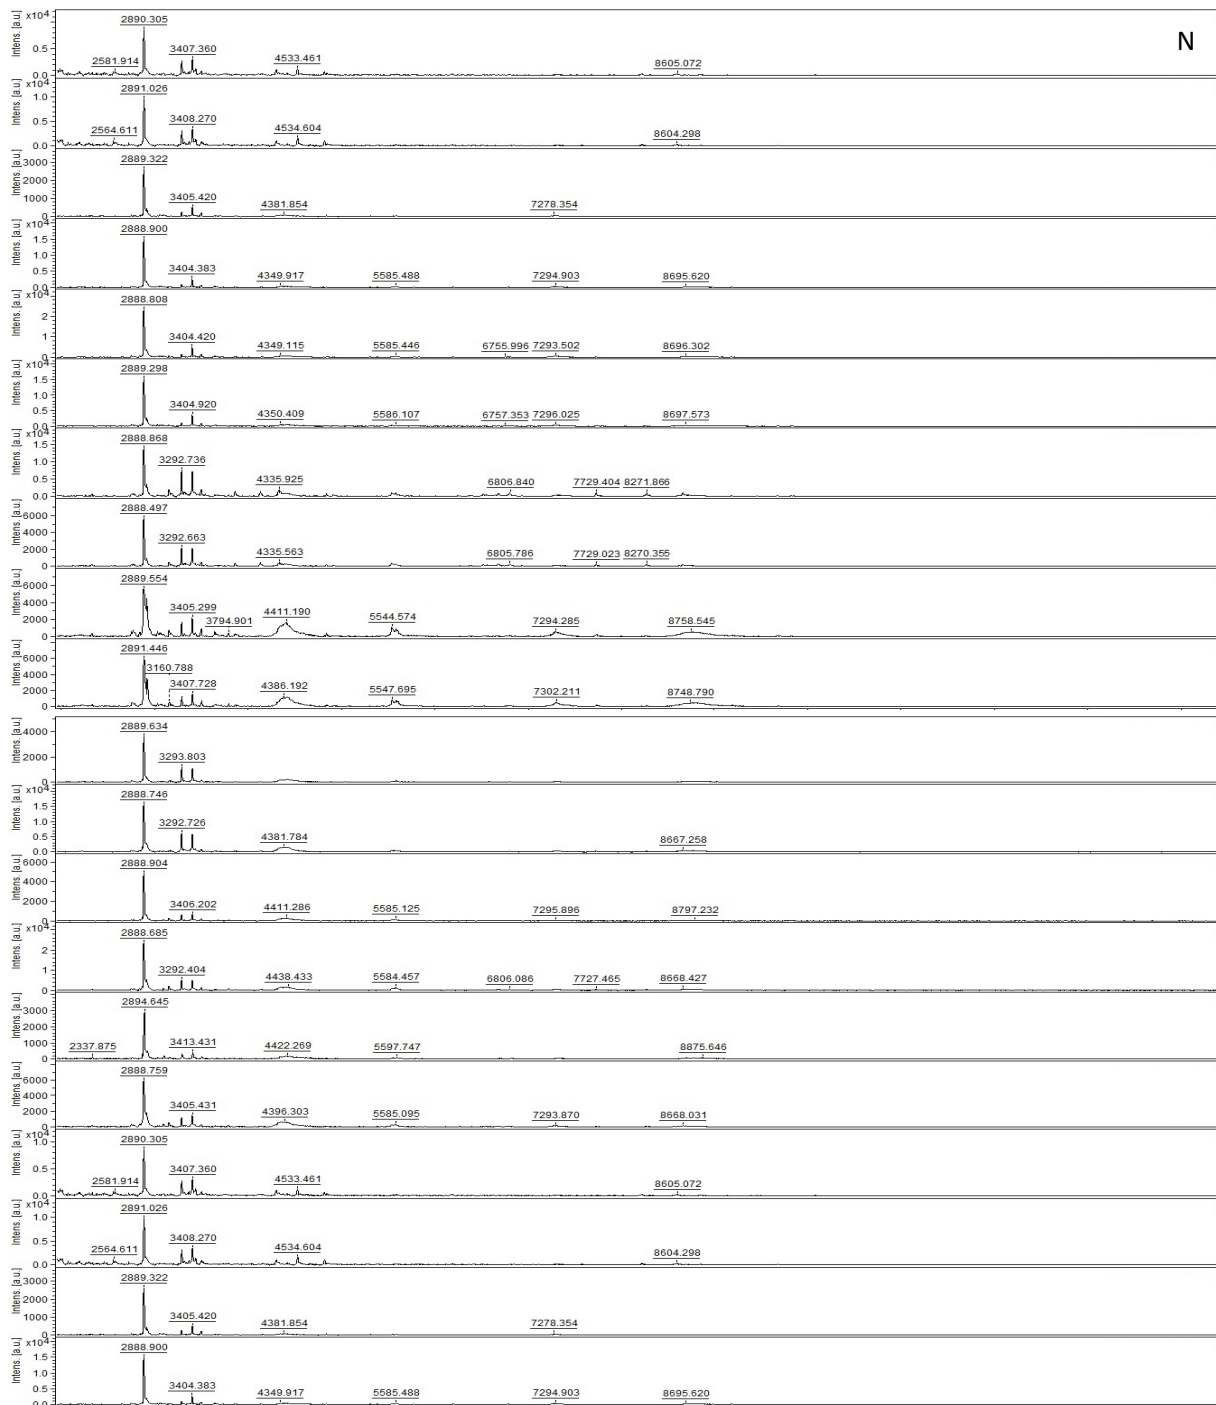

Supplementary Figure 2N. *Scutellospora ovalis*

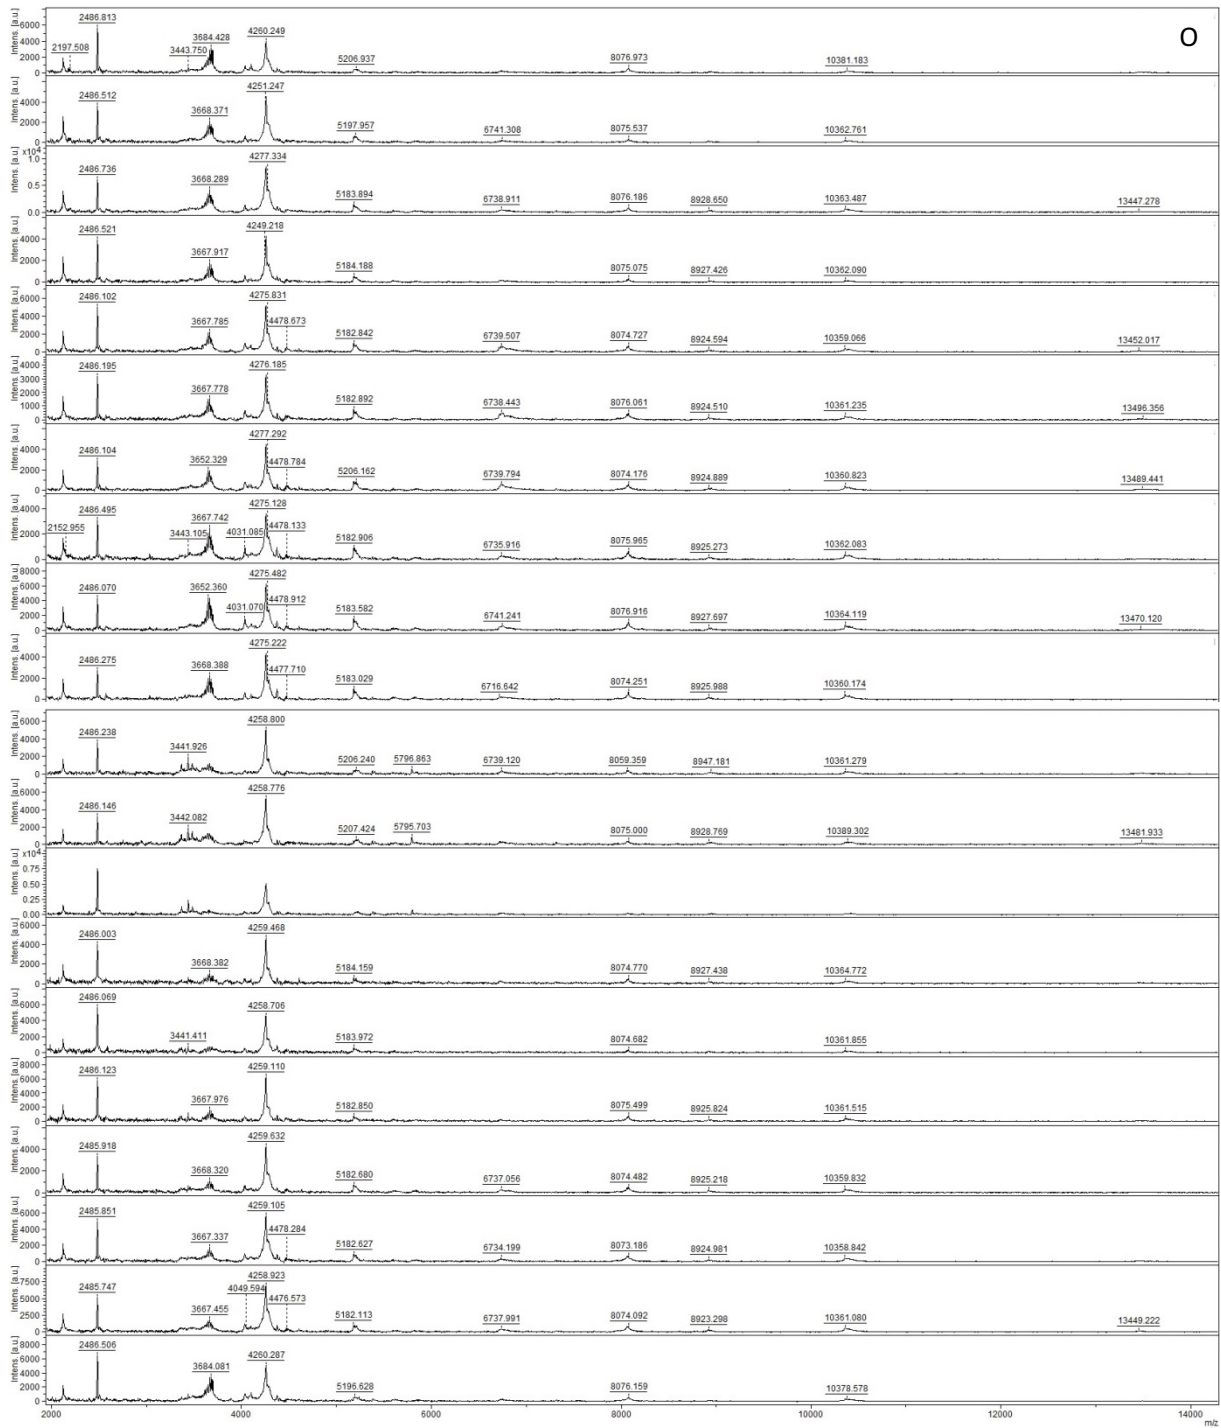

Supplementary Figure 20. *Acaulospora saccata*

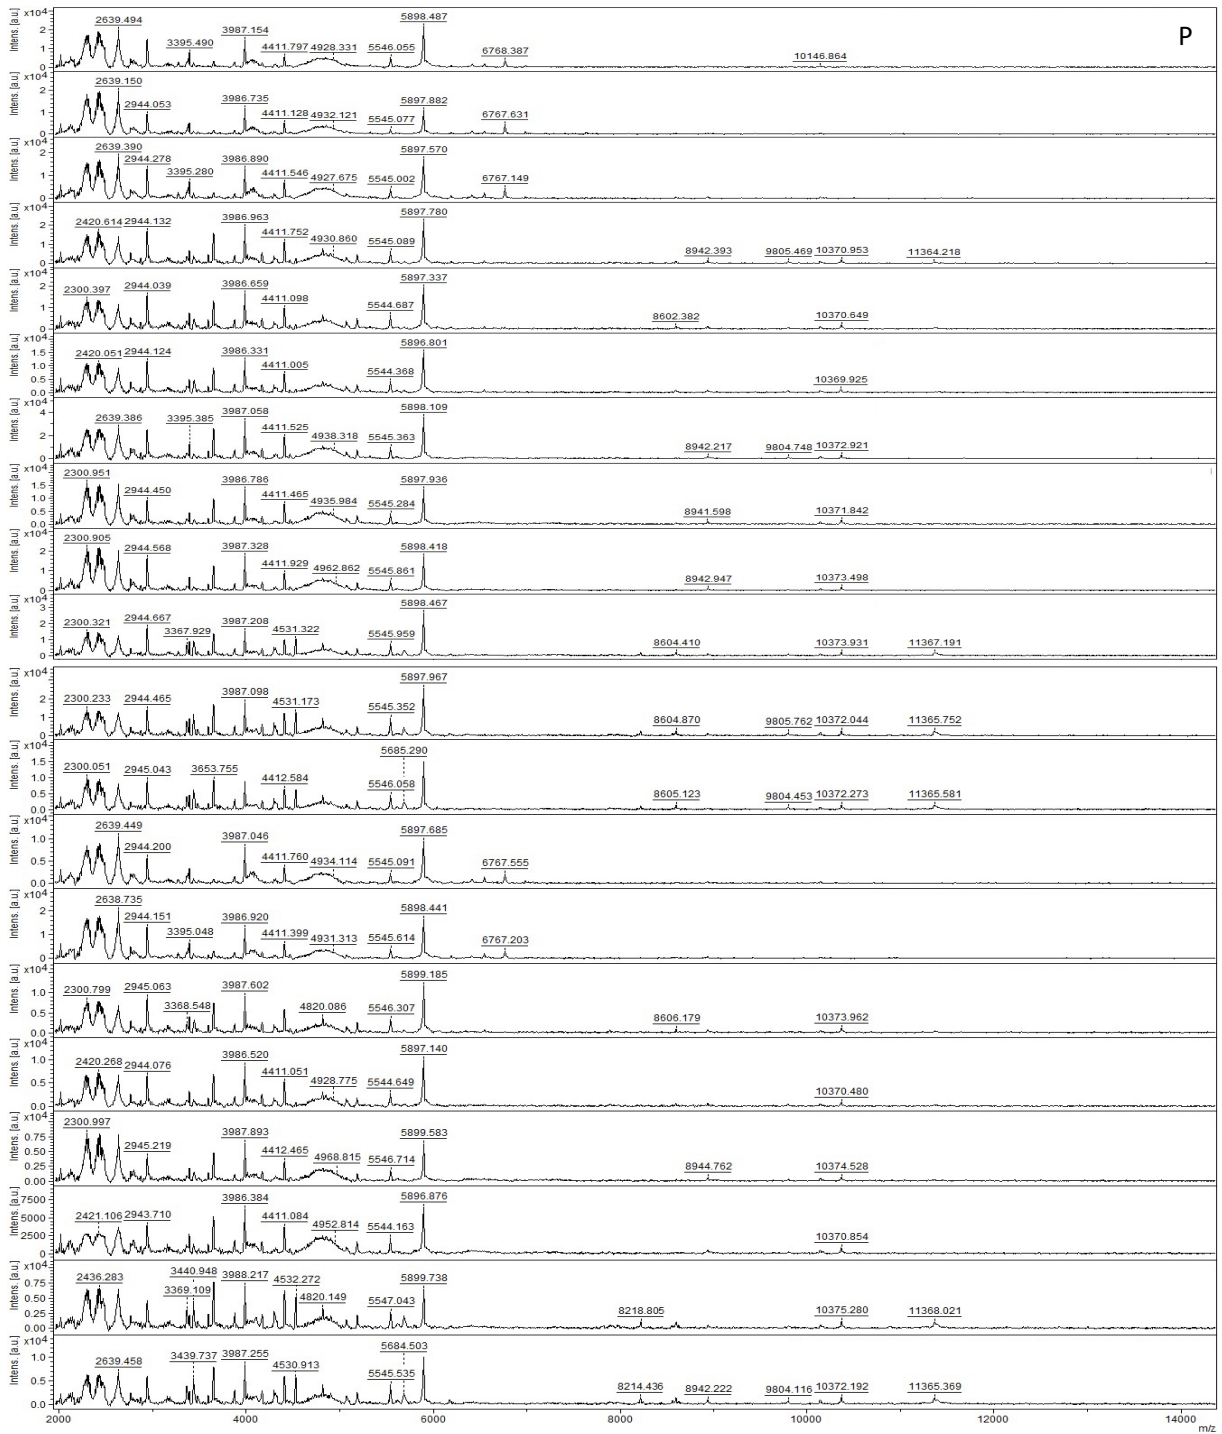

Supplementary Figure 2P. *Acaulospora fragilissima*

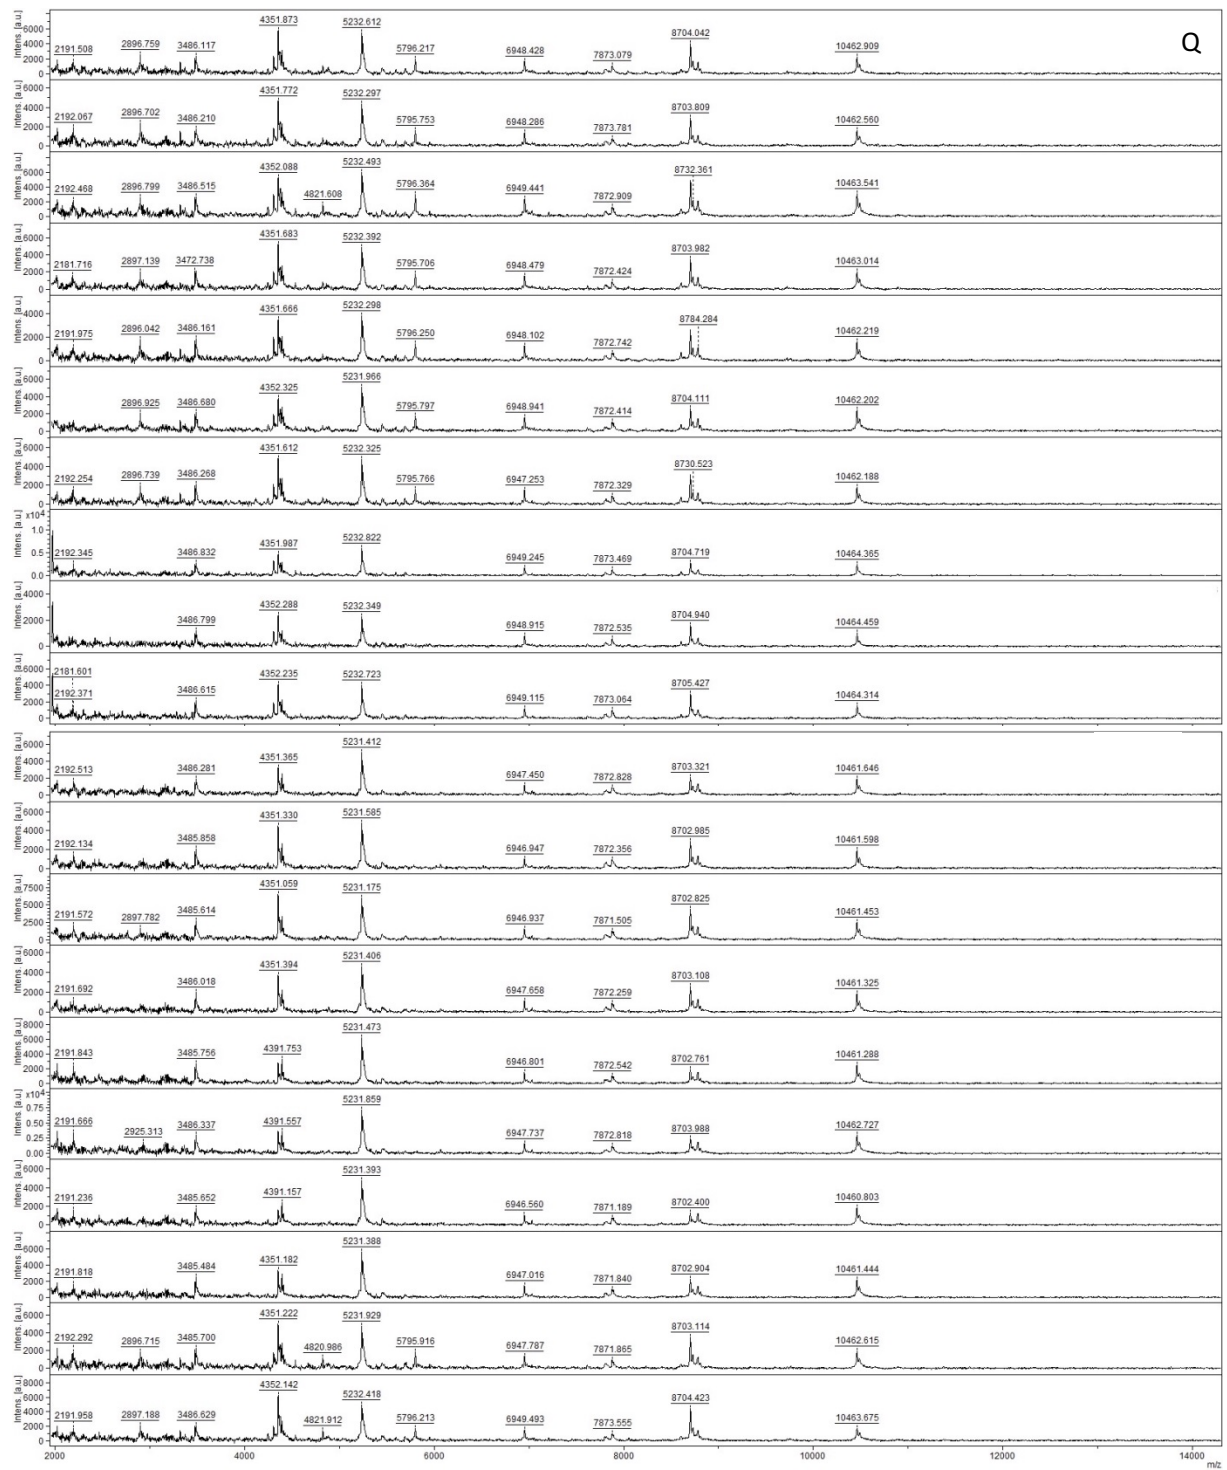

Supplementary Figure 2Q. *Rhizophagus neocaledonicus*

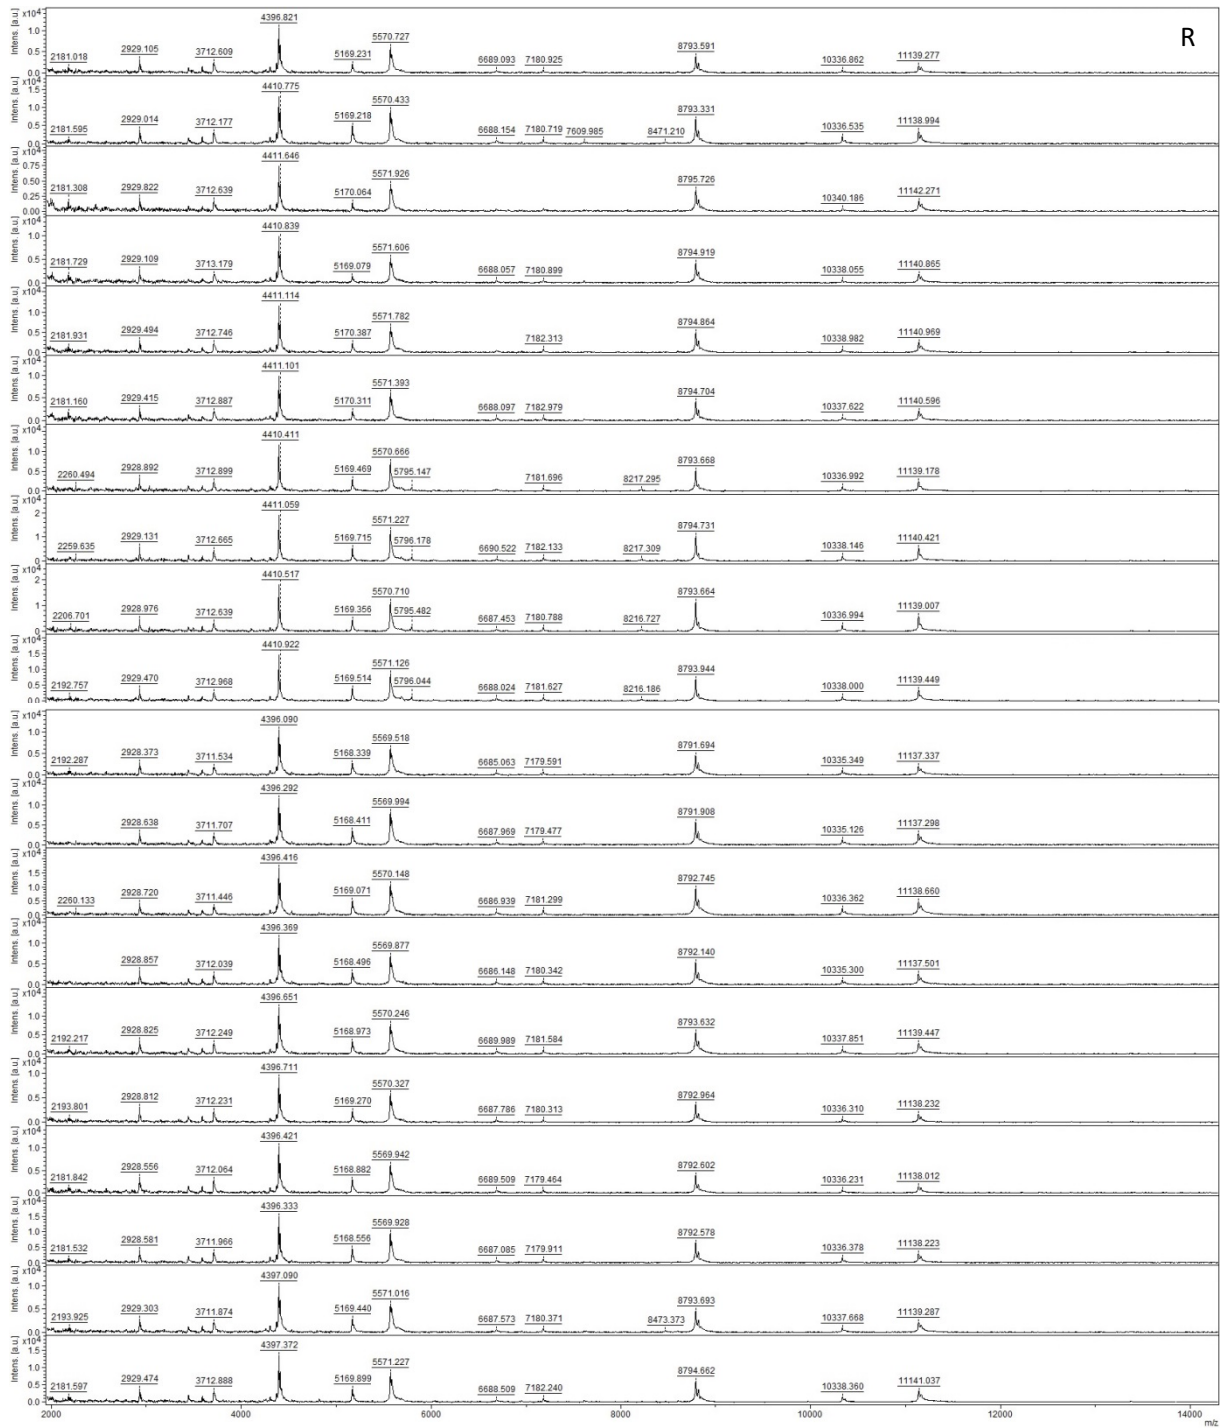

Supplementary Figure 2R. *Claroideoglomus etunicatum nc*

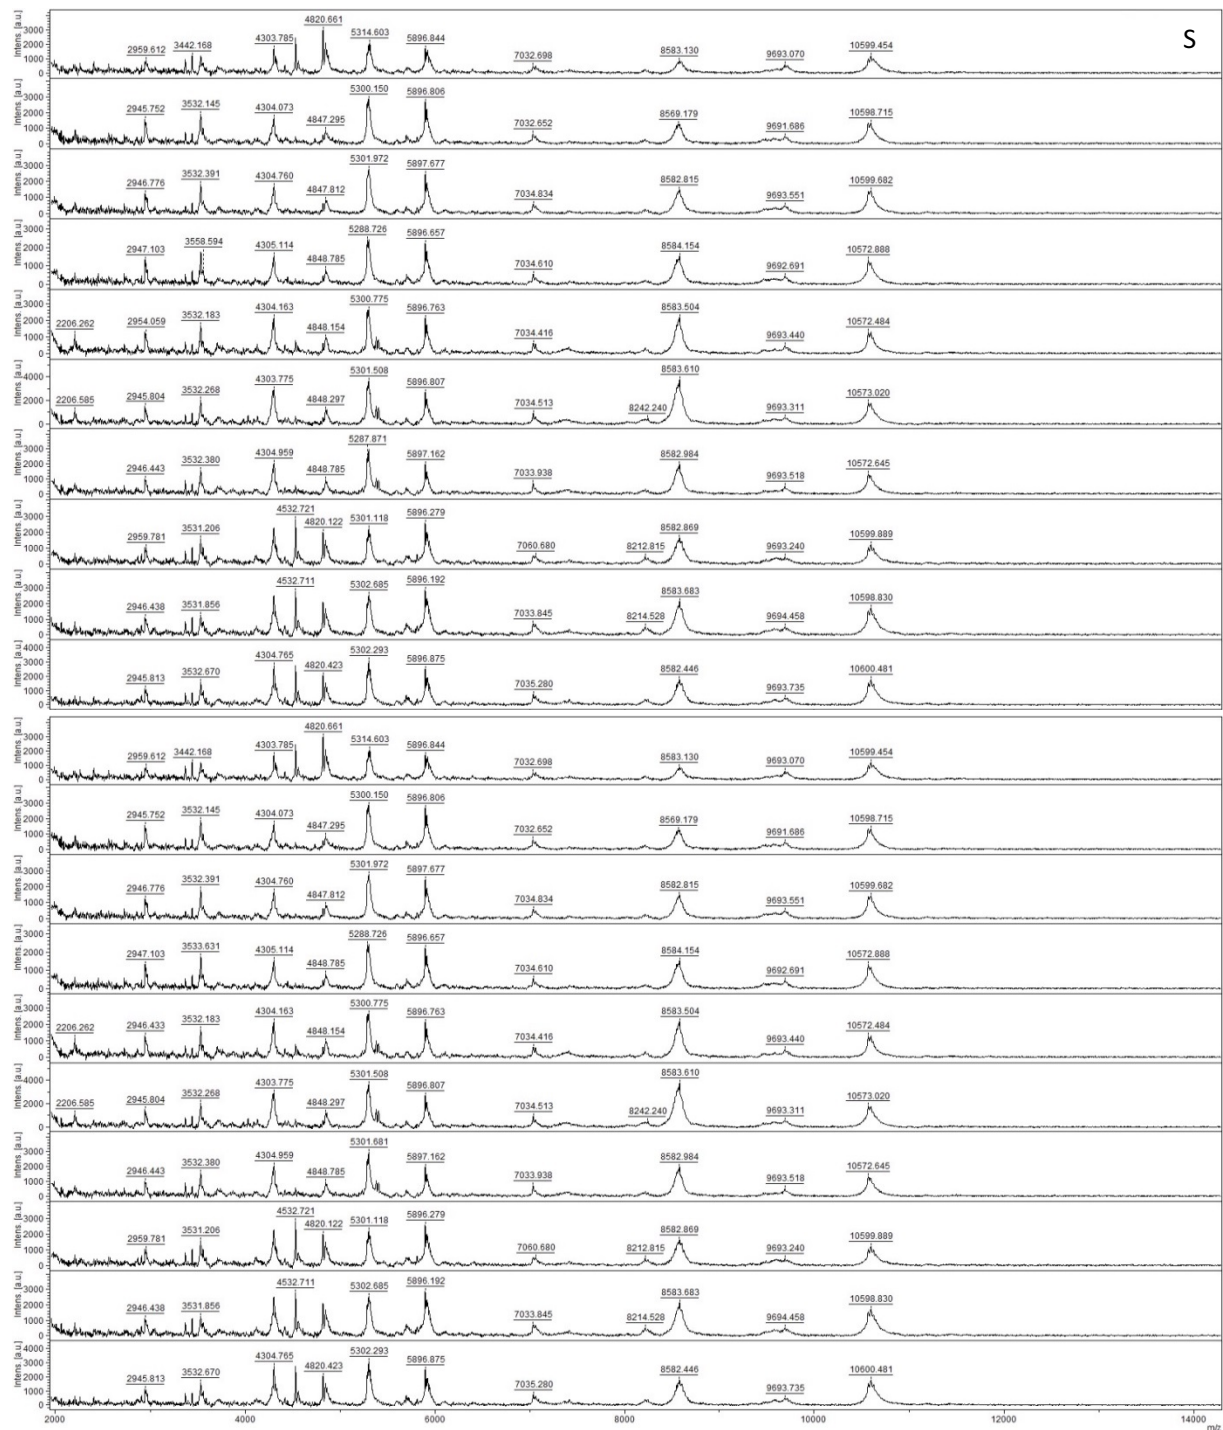

**Supplementary Figure 2S.** *Pervetustus simplex nc*

**Figure S2.** Selection of spectra from biological replicate (n=8) MALDI-TOF mass spectra of all studied species for MSP creation. Demonstrating the high degree of reproducibility within sample replicates. A. *Gigaspora rosea* BEG9; B. *Gigaspora margarita* BEG34; C. *Gigaspora candida* BEG17; D. *Scutellospora calospora* BEG32; E. *Rhizophagus clarus* BEG248 ; F. *Rhizophagus clarus* BEG149; G. *Rhizophagus clarus* BEG142 ; H. *Funneliformis coronatum* BEG22; I. *Funneliformis mosseae* BEG12; J. *Claroideogloium etunicatum* BEG247; K. *Claroideogloium claroideum* BEG31; L. *Claroideogloium claroideum* BEG14; M. *Claroideogloium claroideum* BEG23; N. *Scutellospora ovalis*; O. *Acaulospora saccata*; P. *Acaulospora fragilissima*; Q. *Rhizophagus neocaledonicus*; R. *Claroideogloium etunicatum nc*; S. *Pervetustus simplex nc*.

*Acaulospora fragilissima* sp

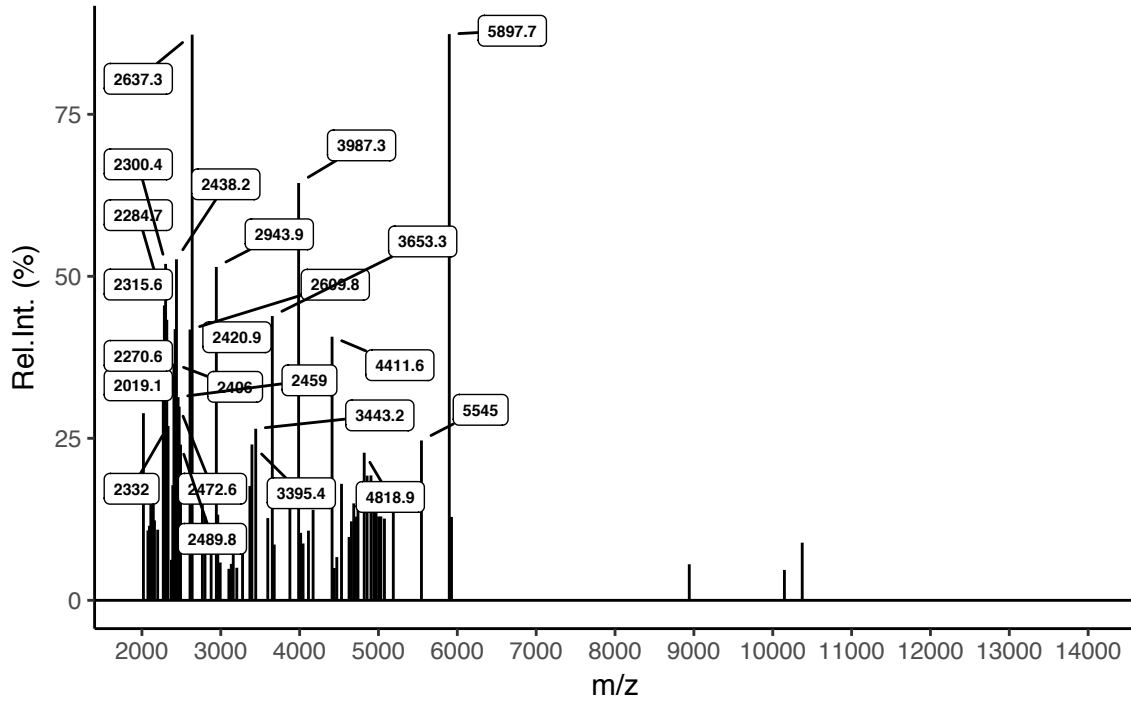

*Acaulospora saccata*

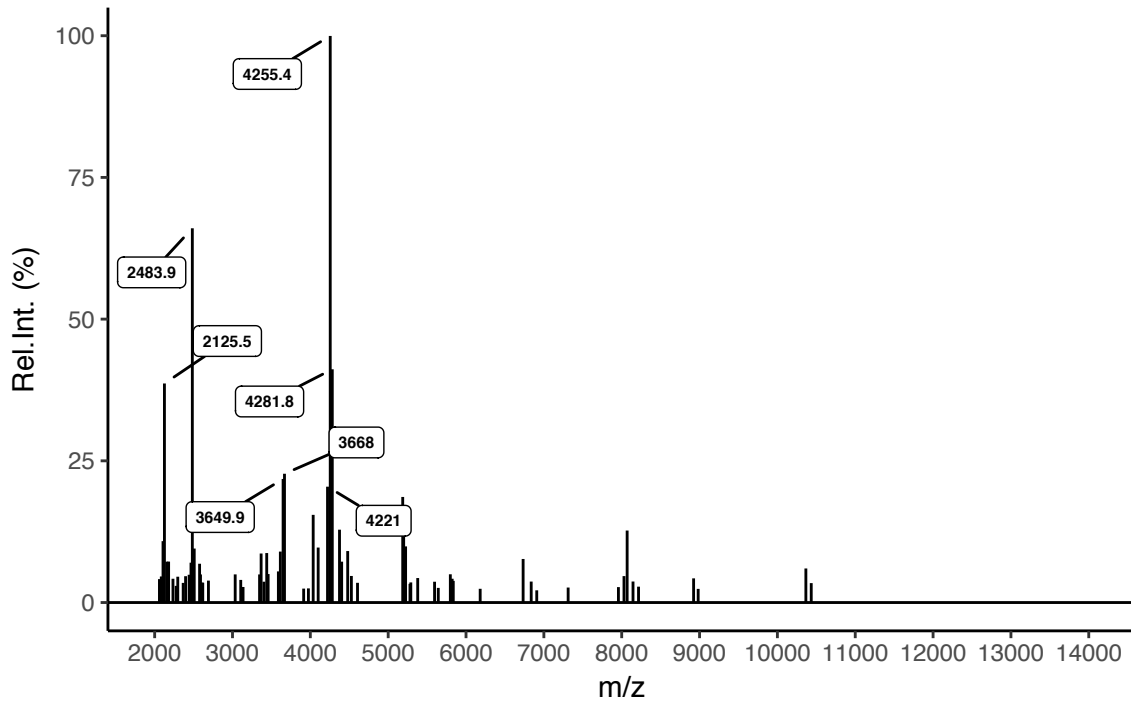

Claroideoglomus claroideum BEG14 sp

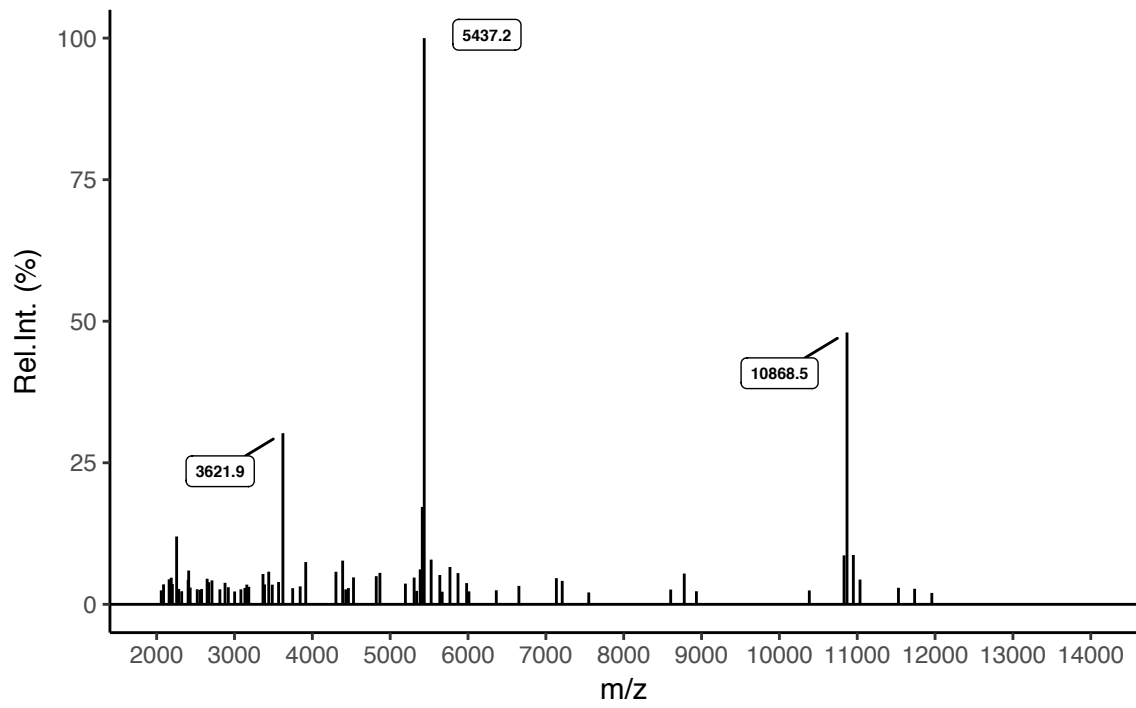

Claroideoglomus claroideum BEG23

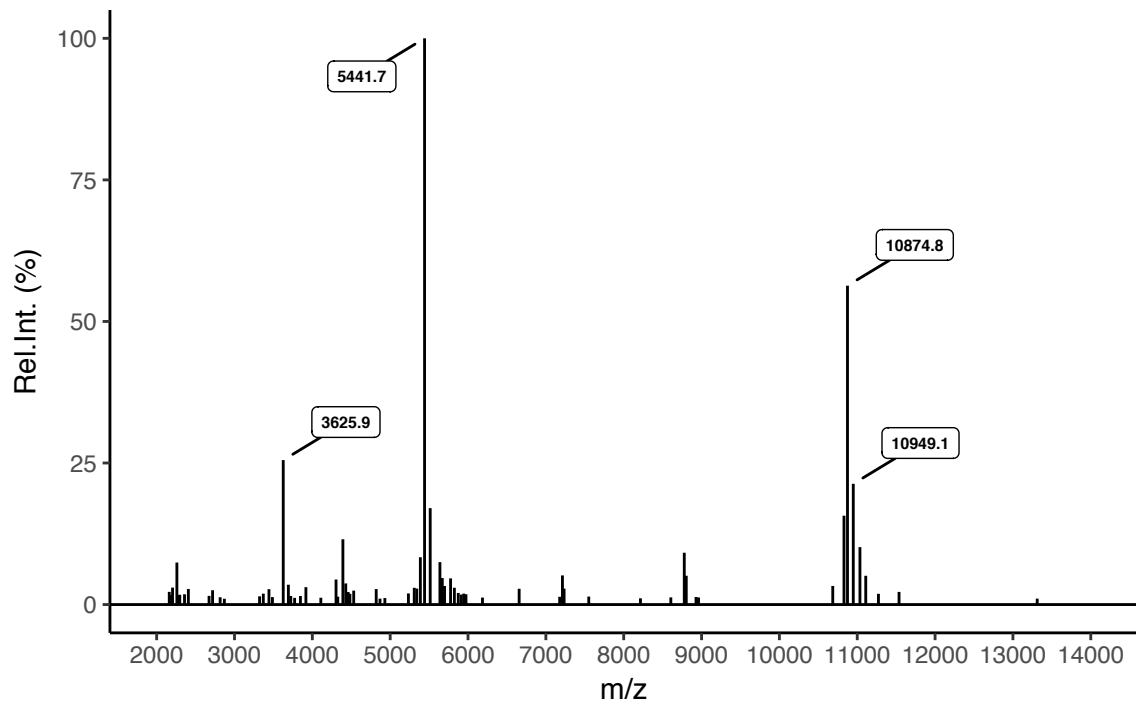



Claroideoglomus claroideum BEG31

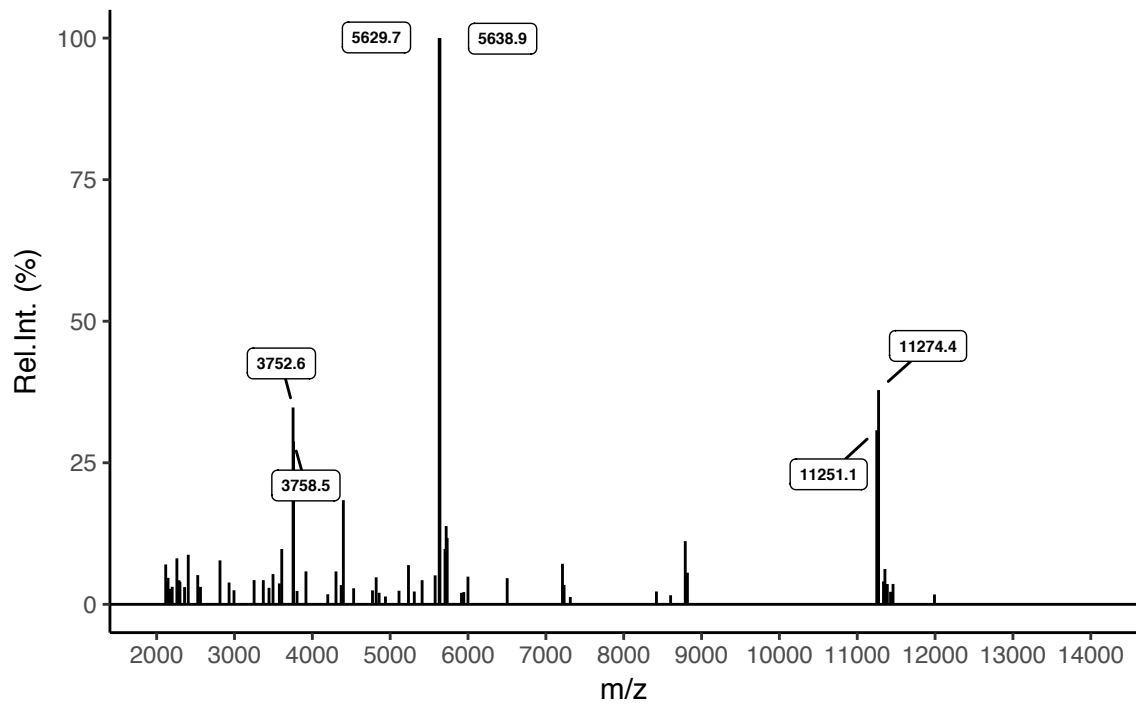

Claroideoglomus etunicatum BEG247

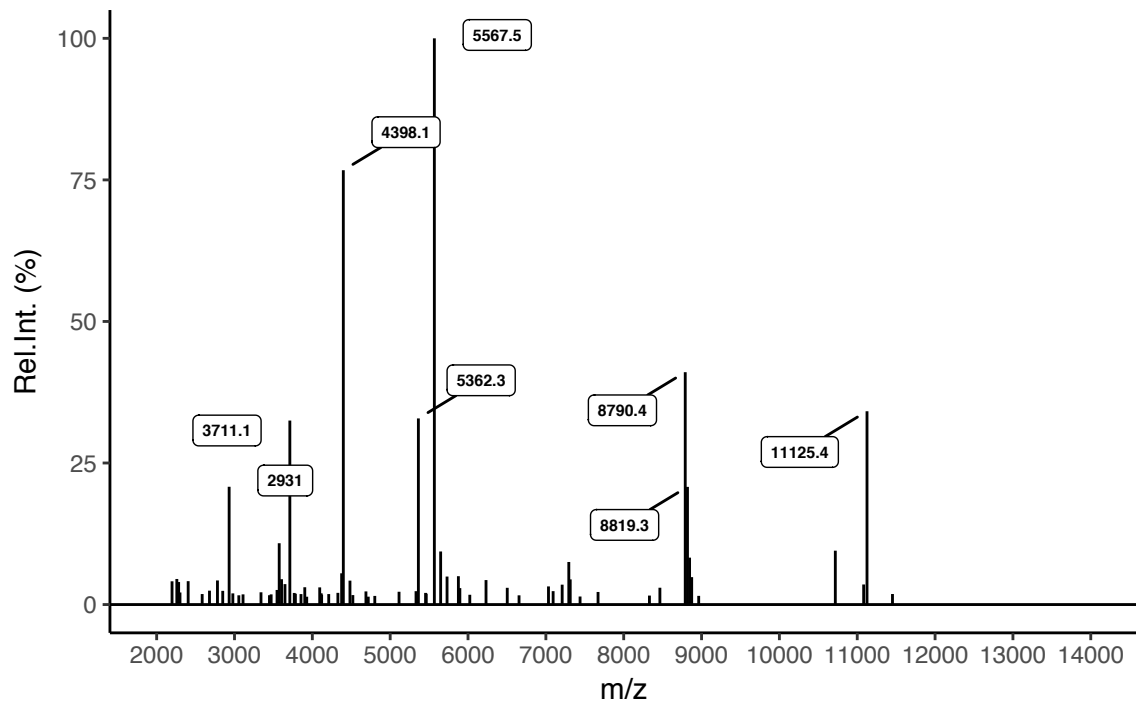

Claroideoglomus etunicatum nc

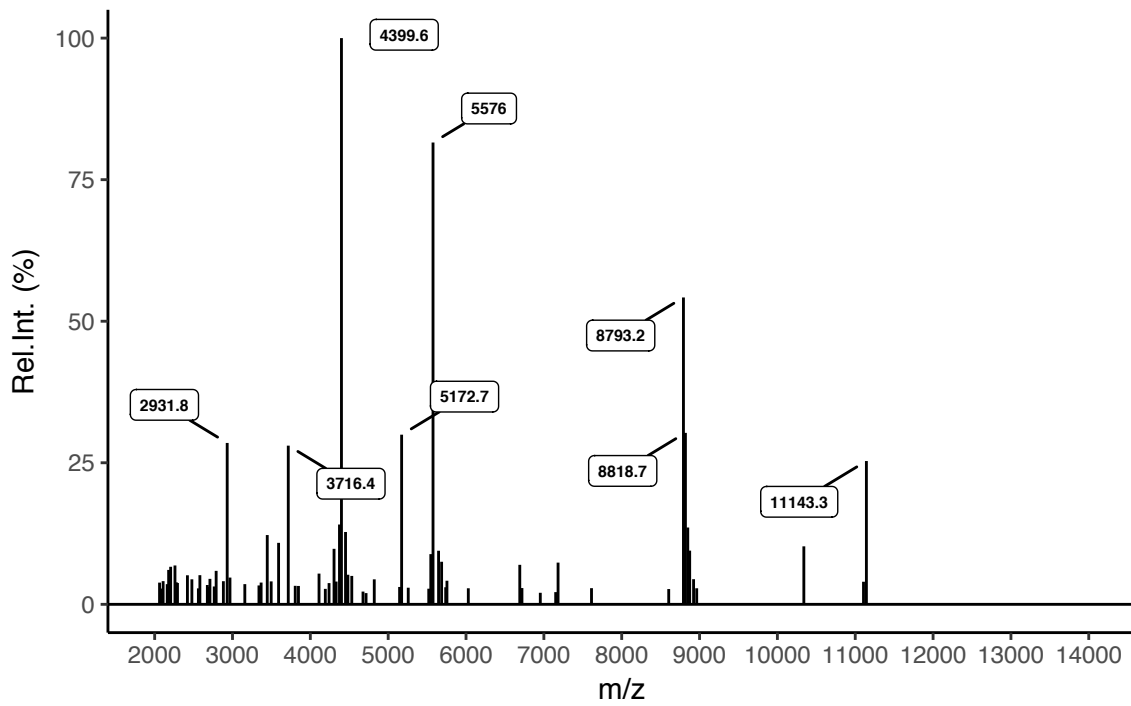

Funneliformis coronatum BEG22

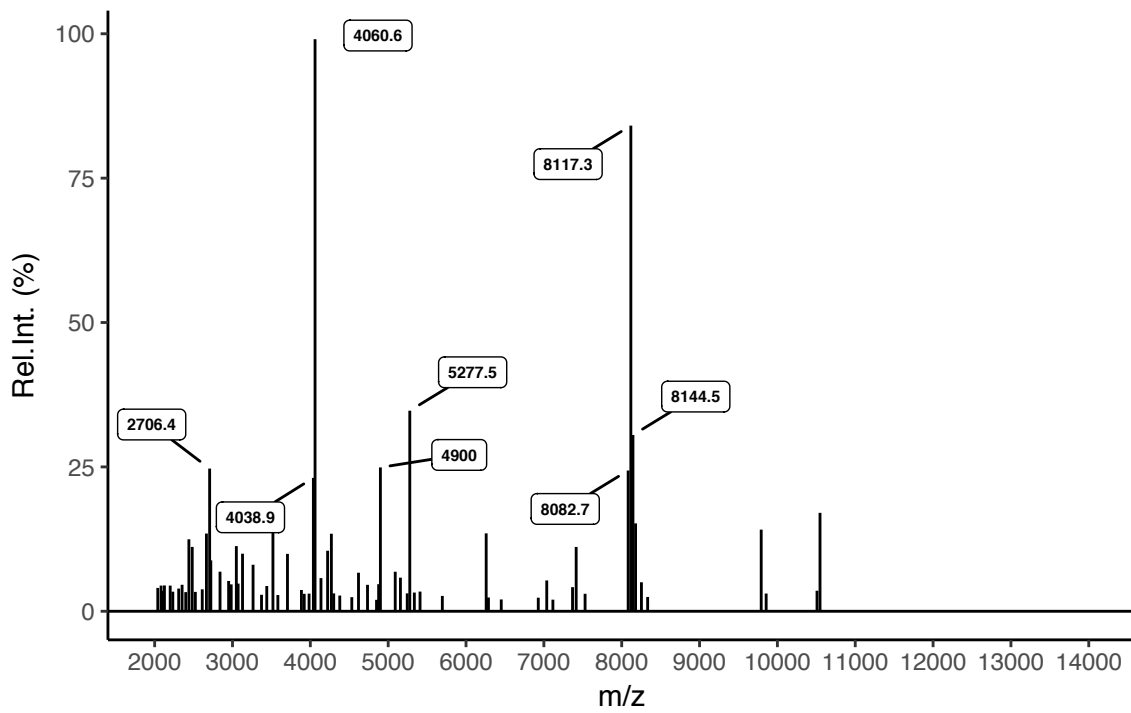

Funneliformis mosseae BEG12

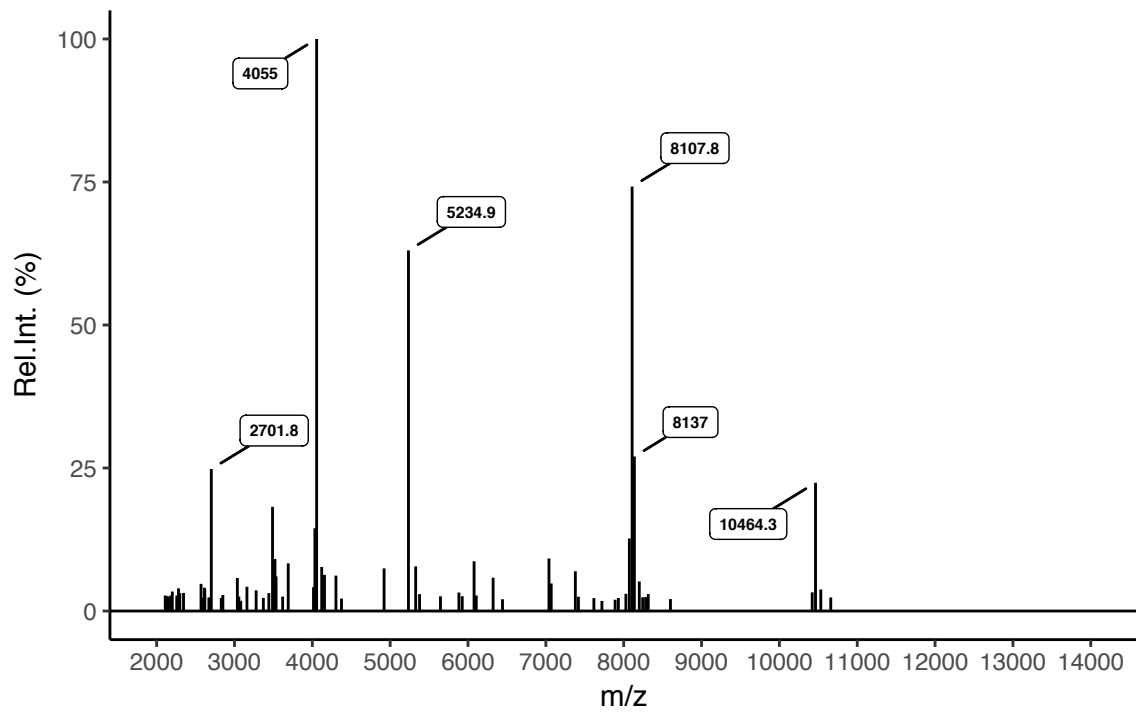

Gigaspora candida BEG17

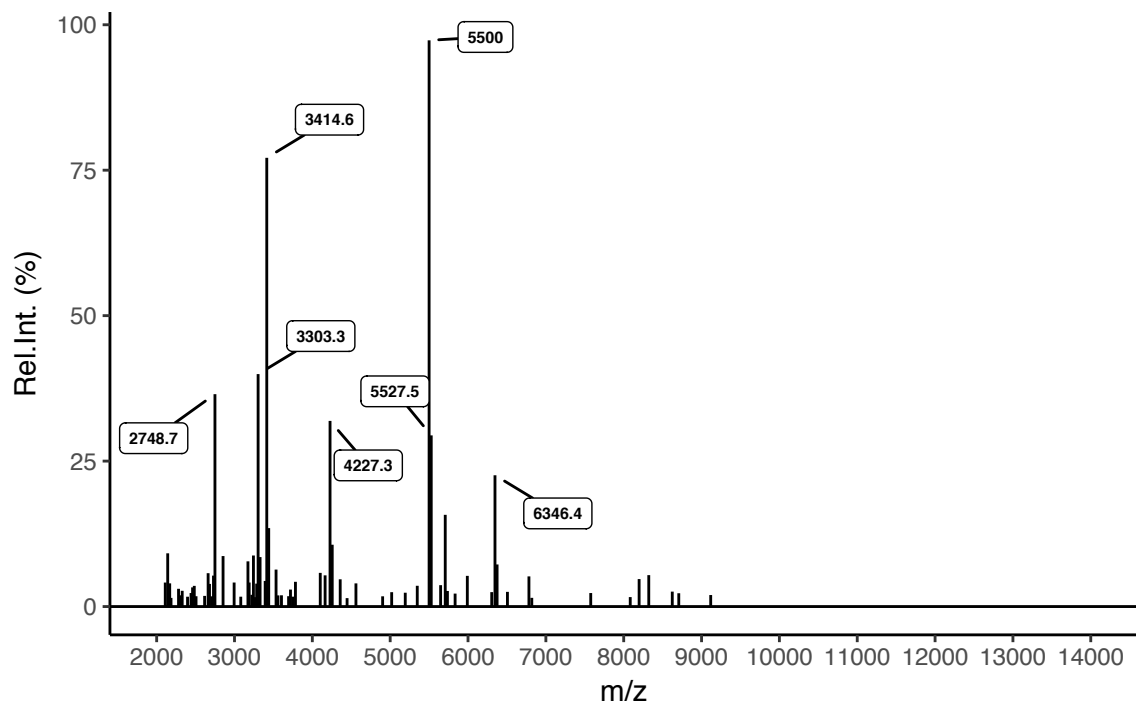

### Gigaspora margarita BEG34

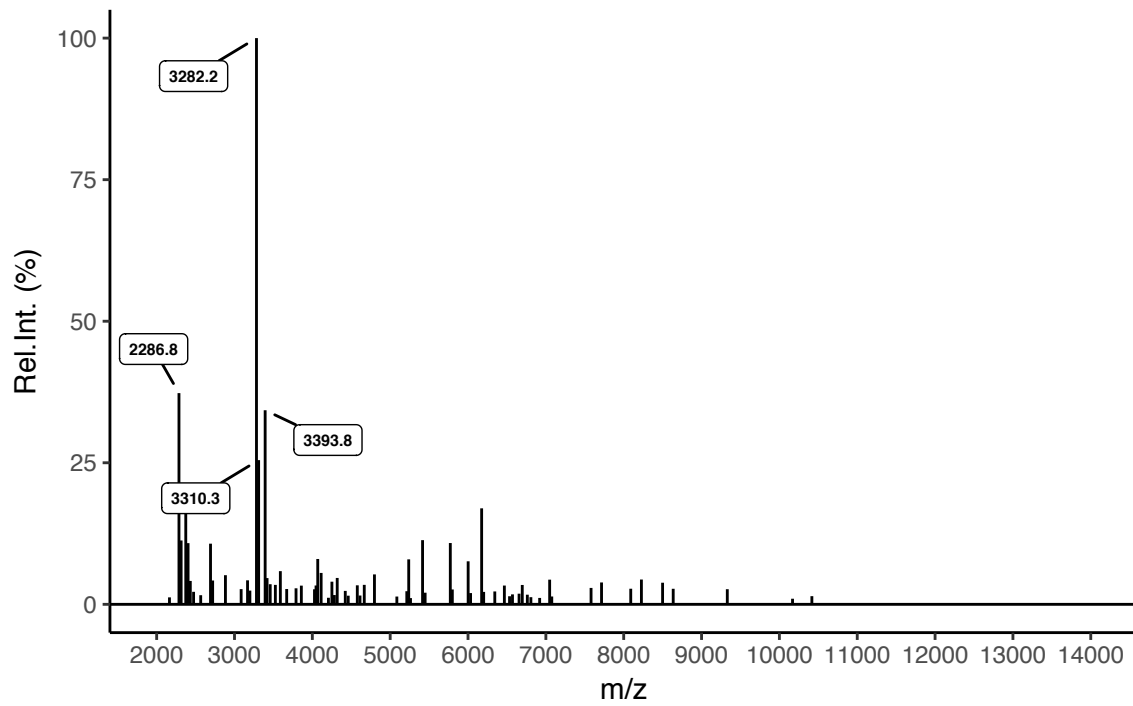

### Gigaspora rosea BEG09

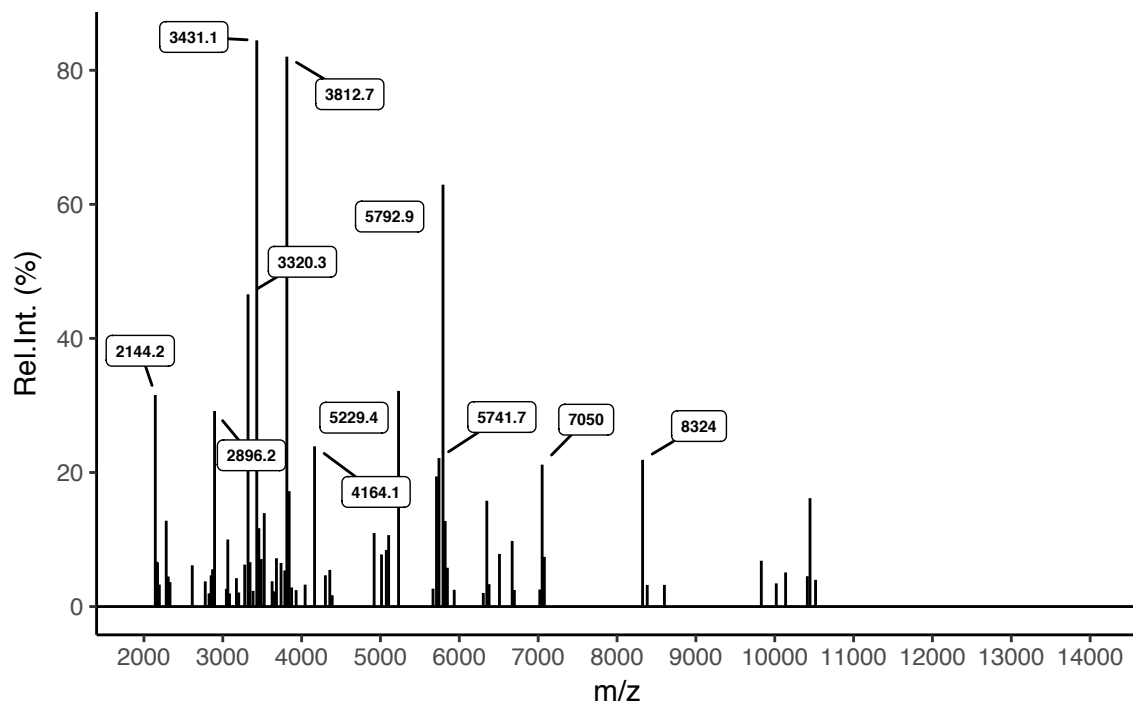

Pervetustus simplex nc

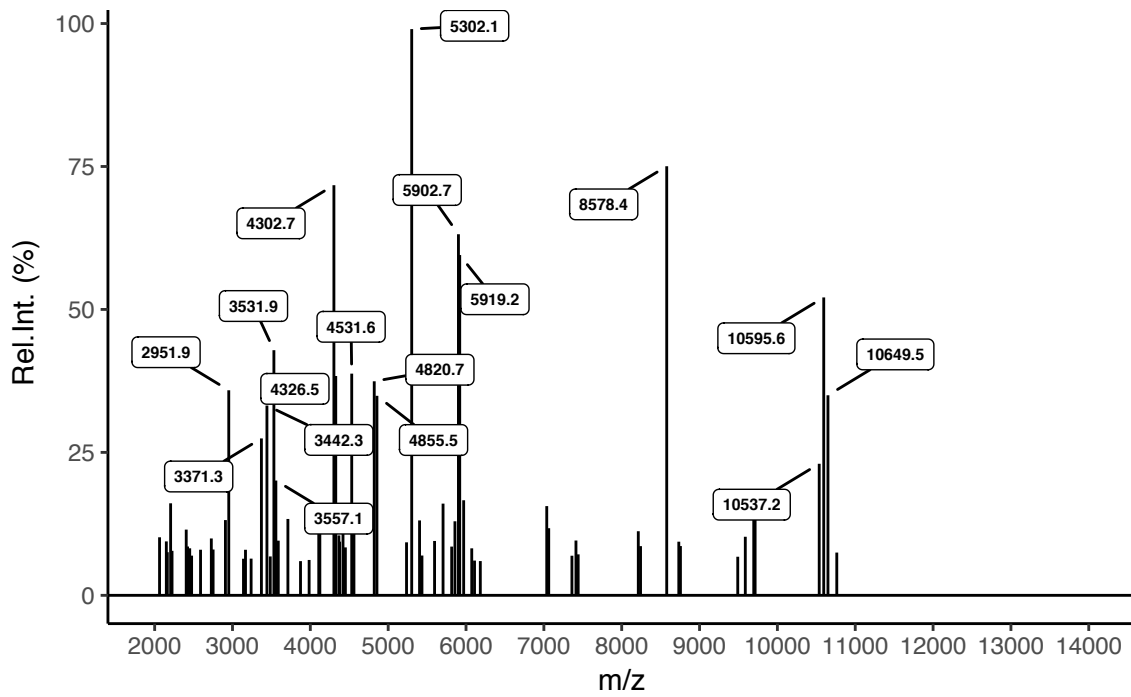

Rhizophagus clarus BEG142

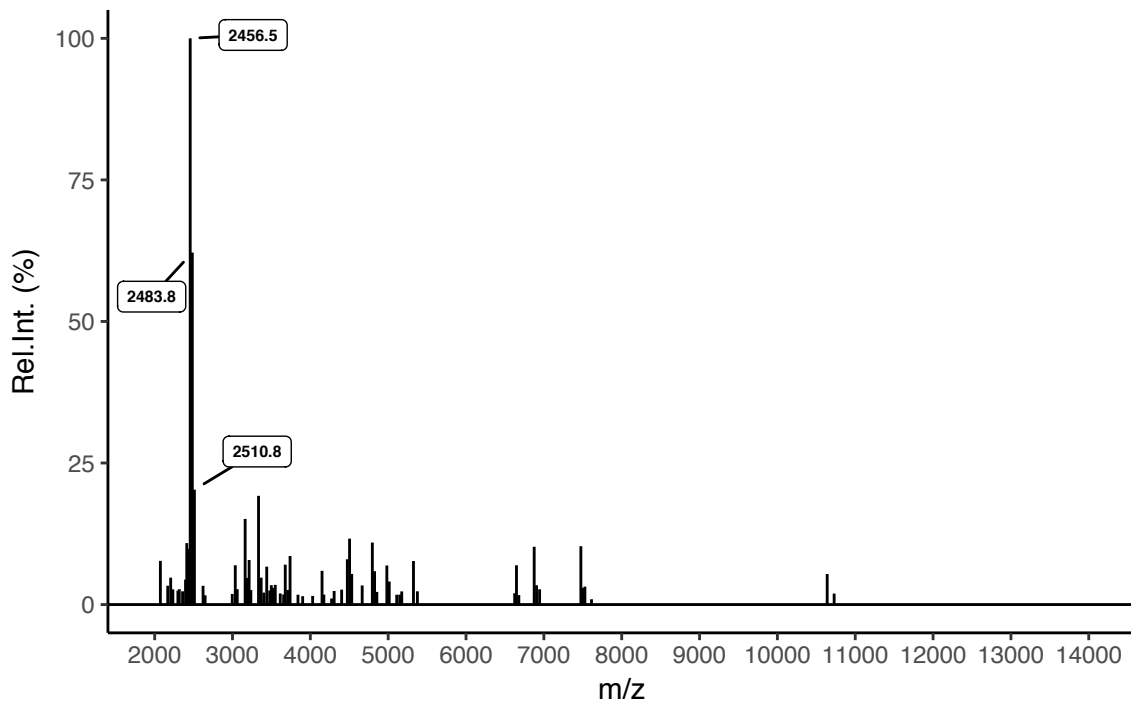

### Rhizophagus clarus BEG149

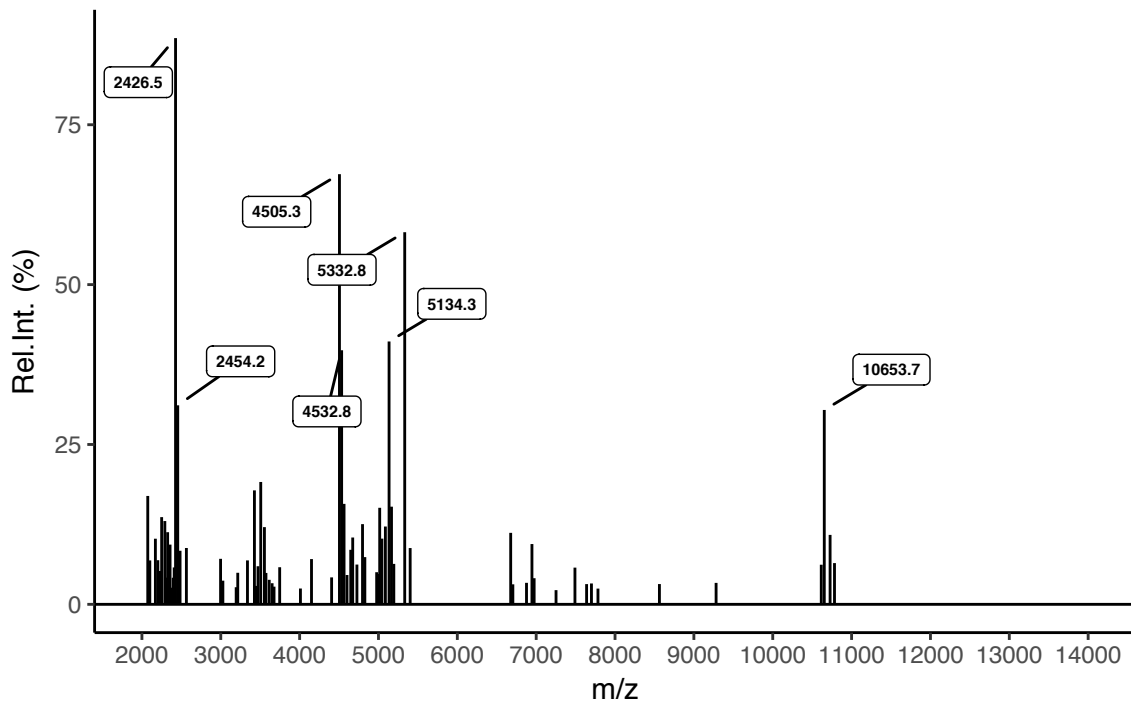

### Rhizophagus clarus BEG248

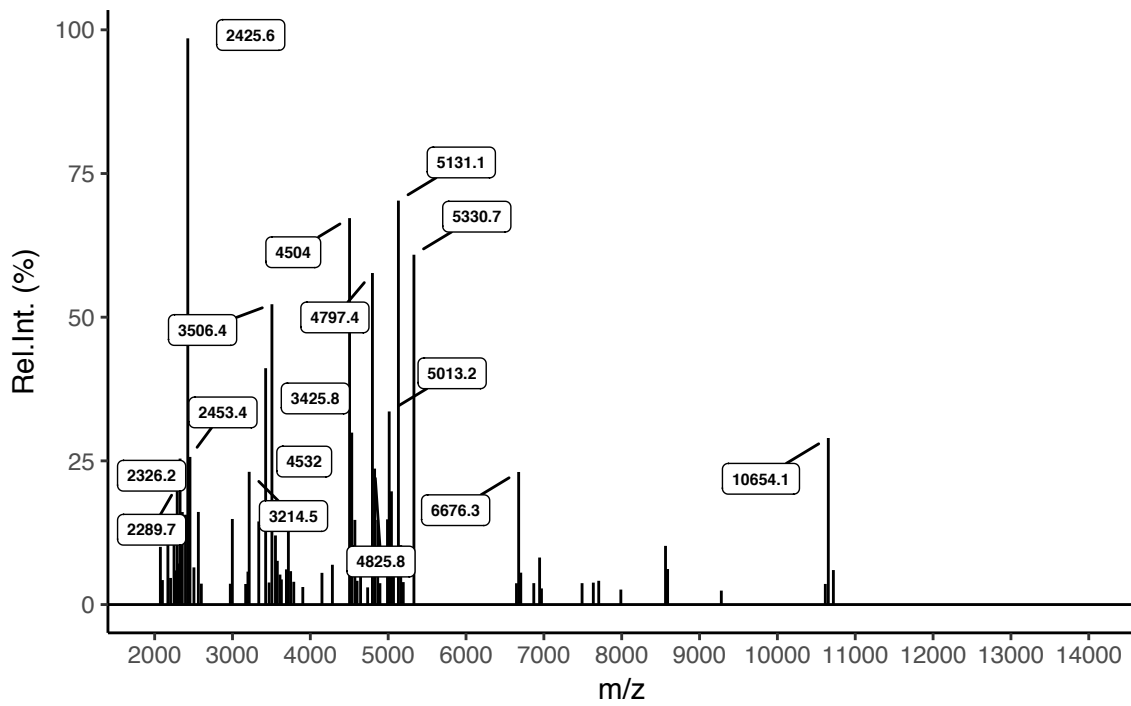

### Rhizophagus neocaledonicus

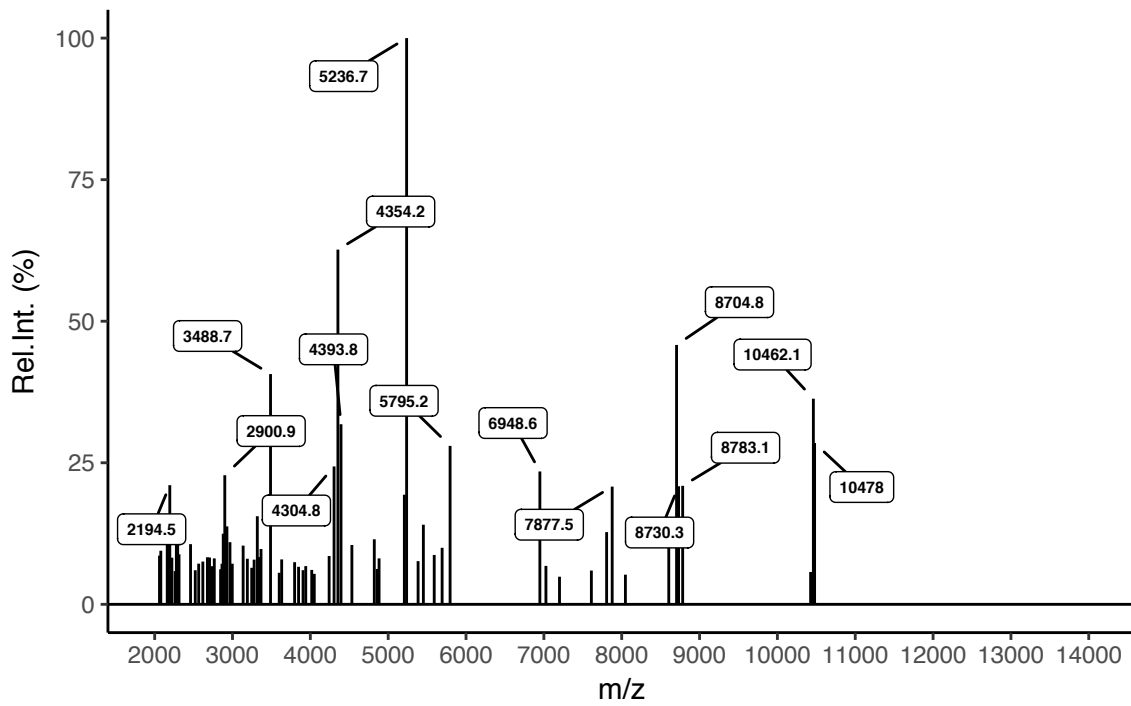

### Scutellospora calospora BEG32

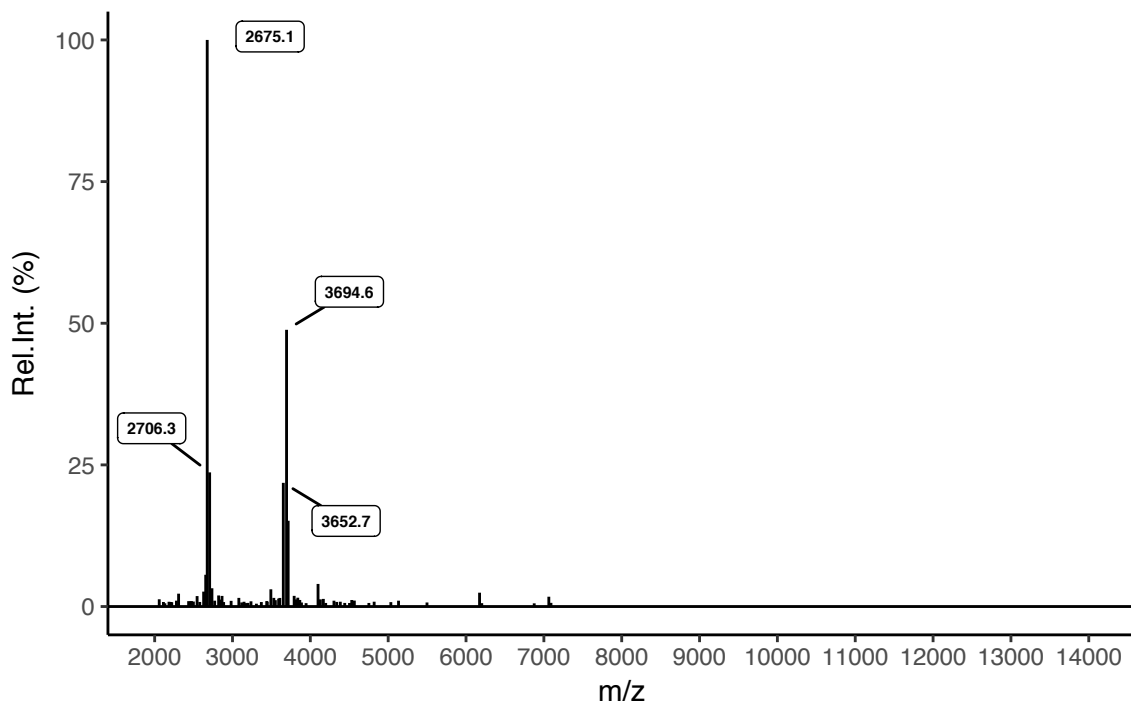

### Scutellospora ovalis

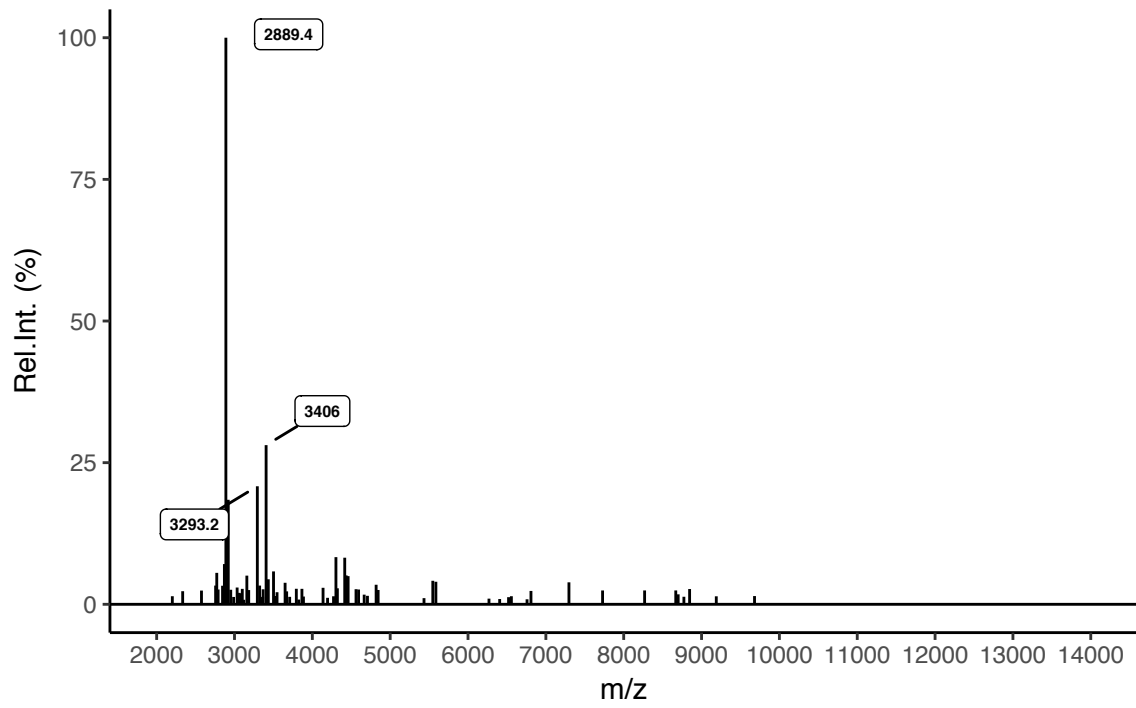

**Supplementary Figure 3.** MALDI-TOF-MS main spectrum data export of all studied species for MSP centroid representation under R software (version 3.3.2<sup>30</sup>).



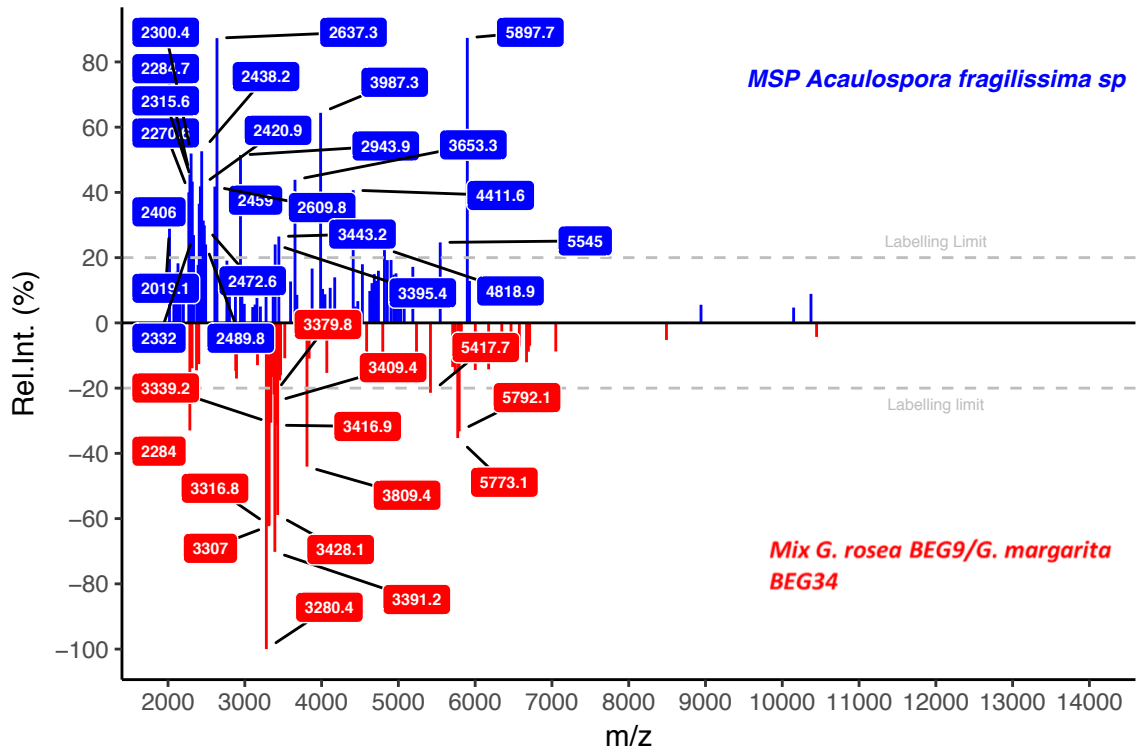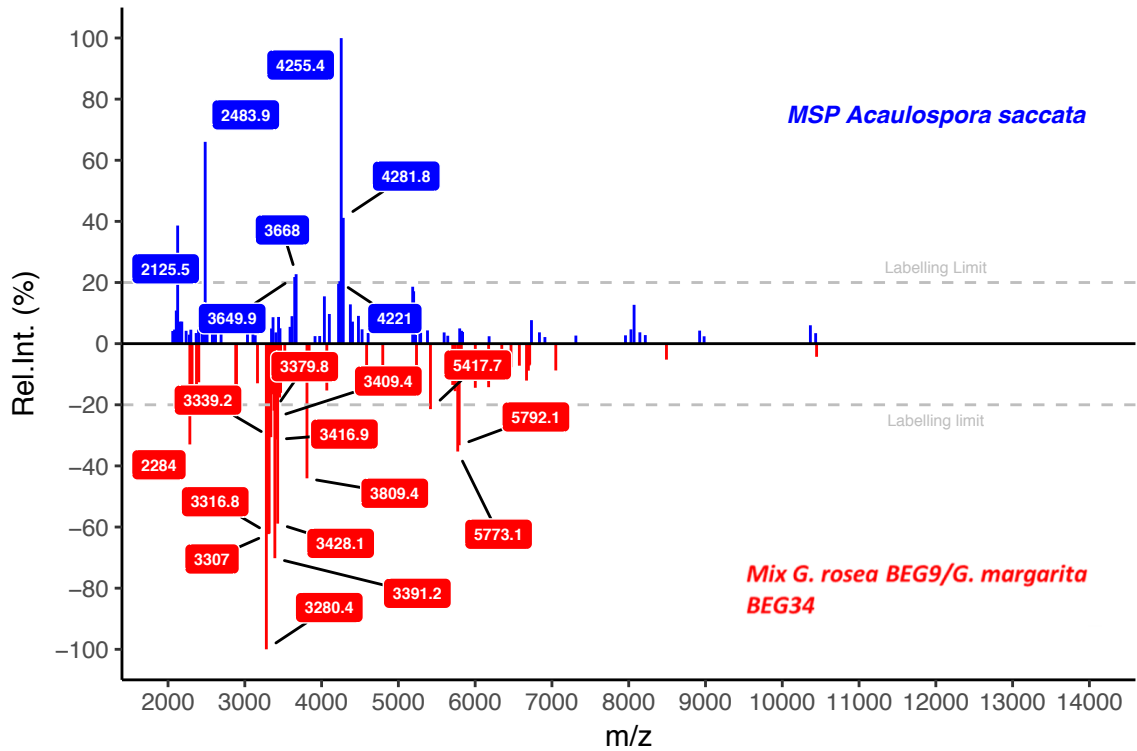

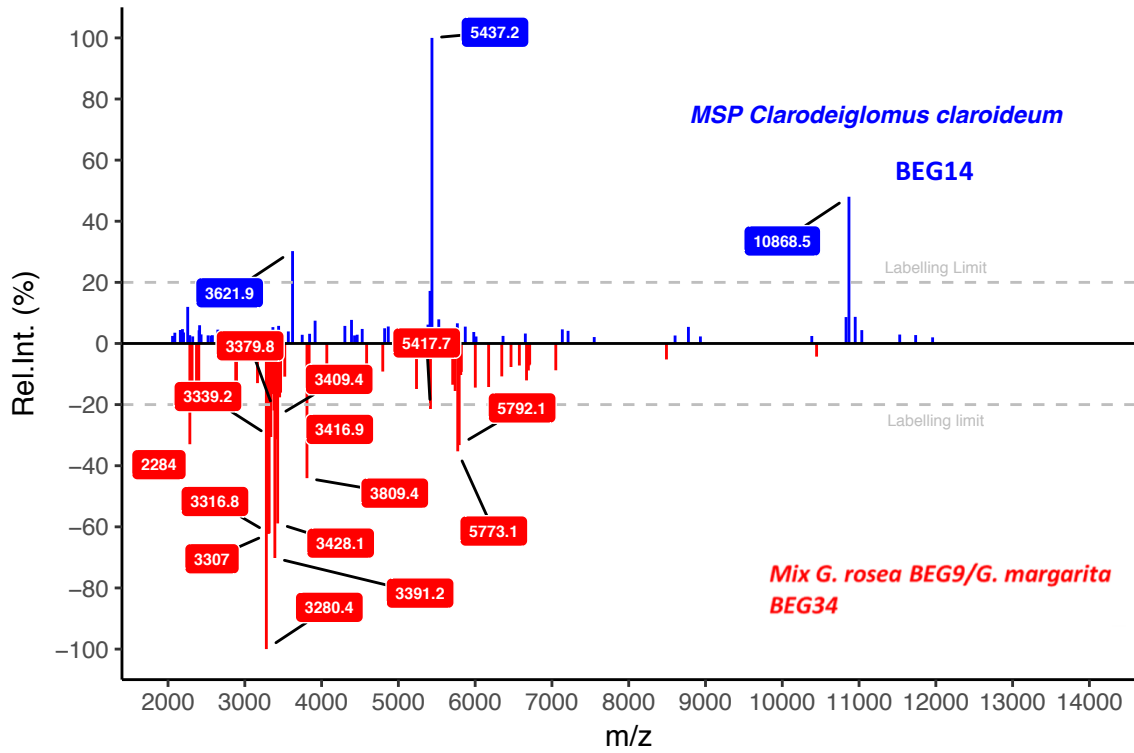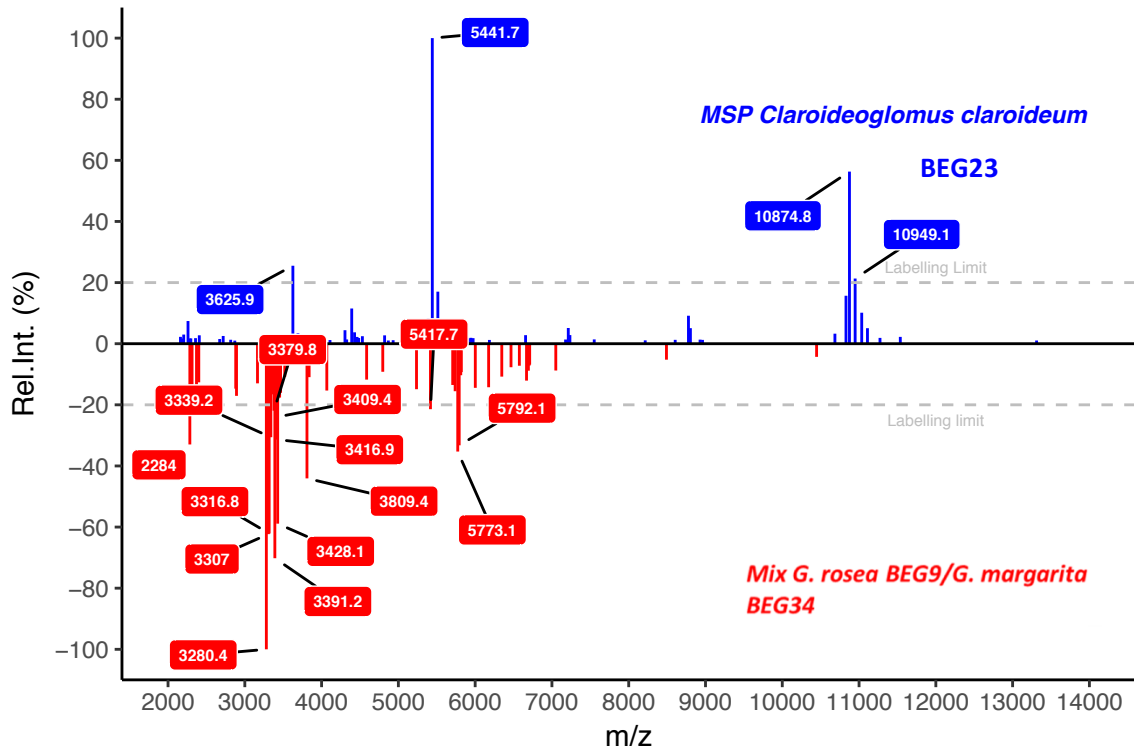

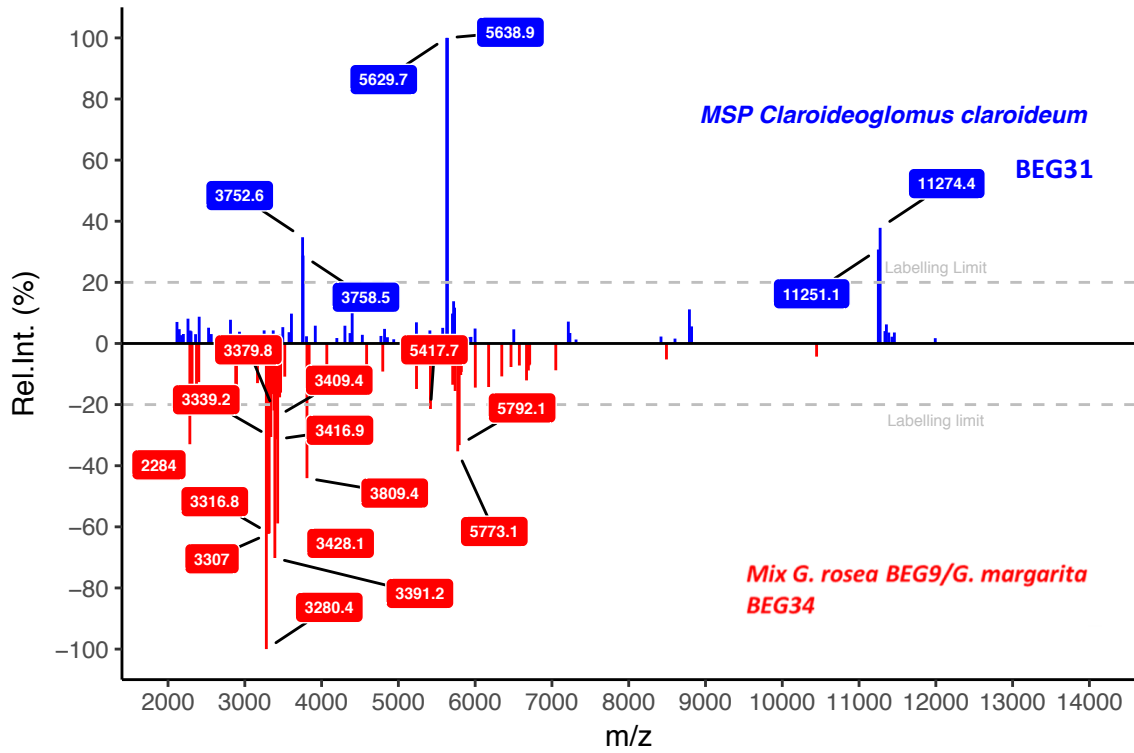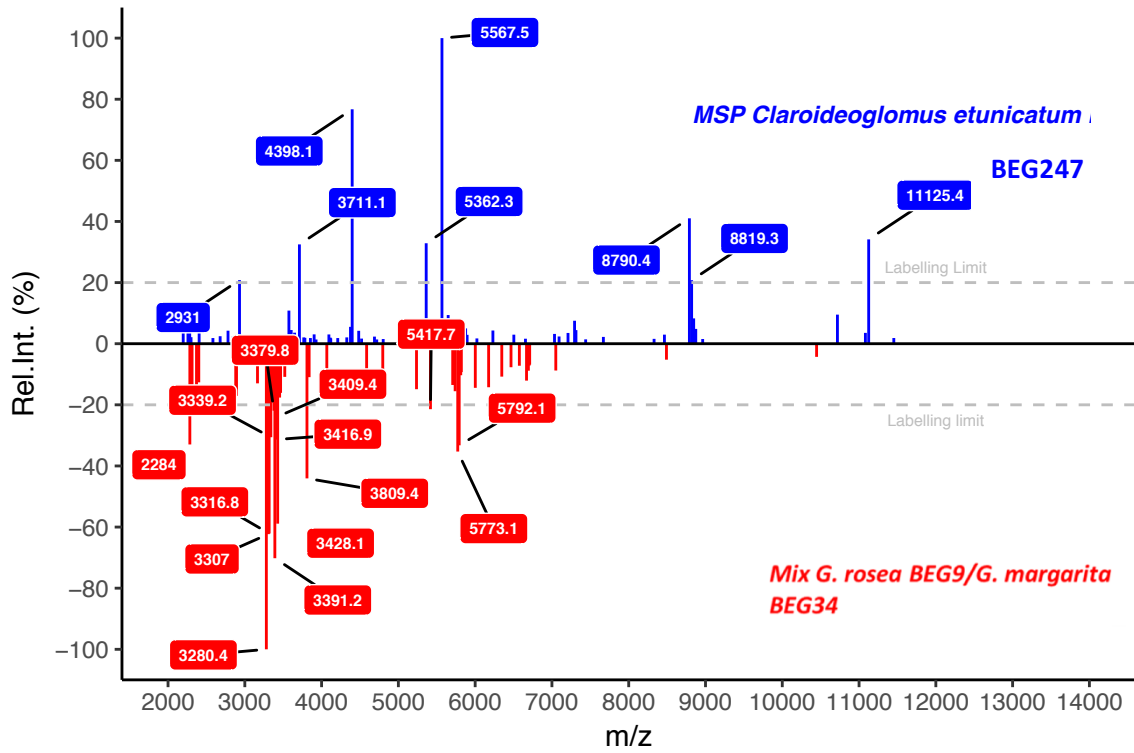

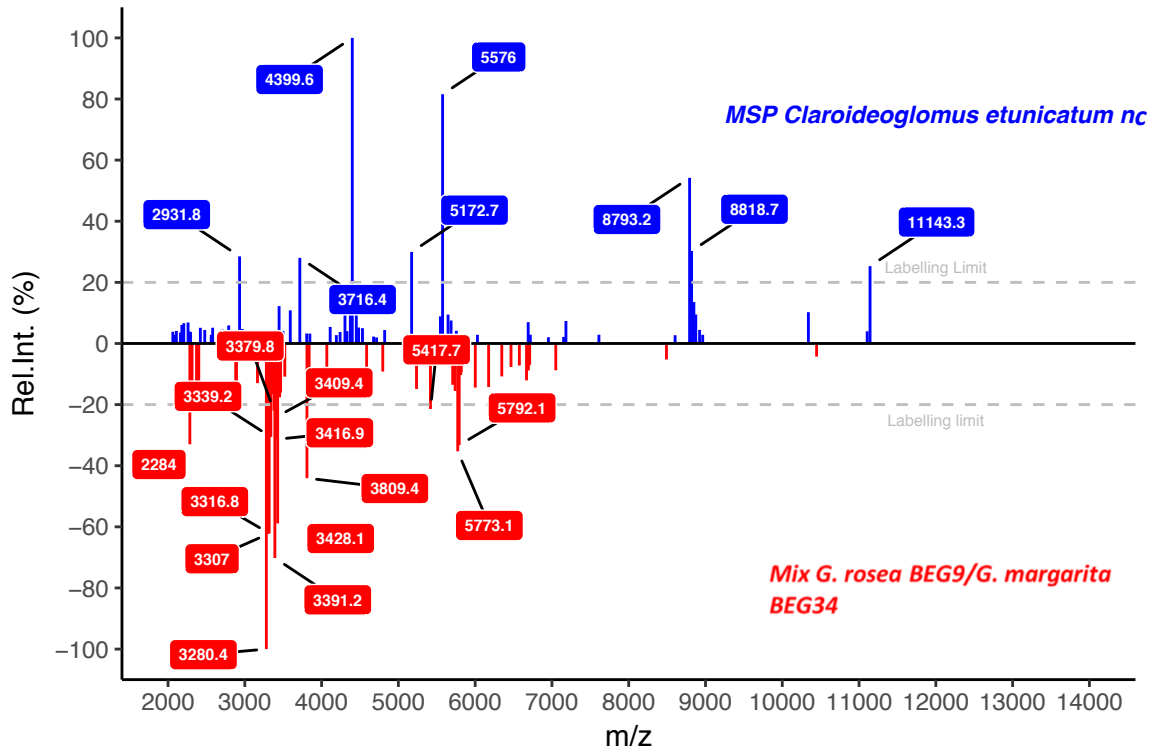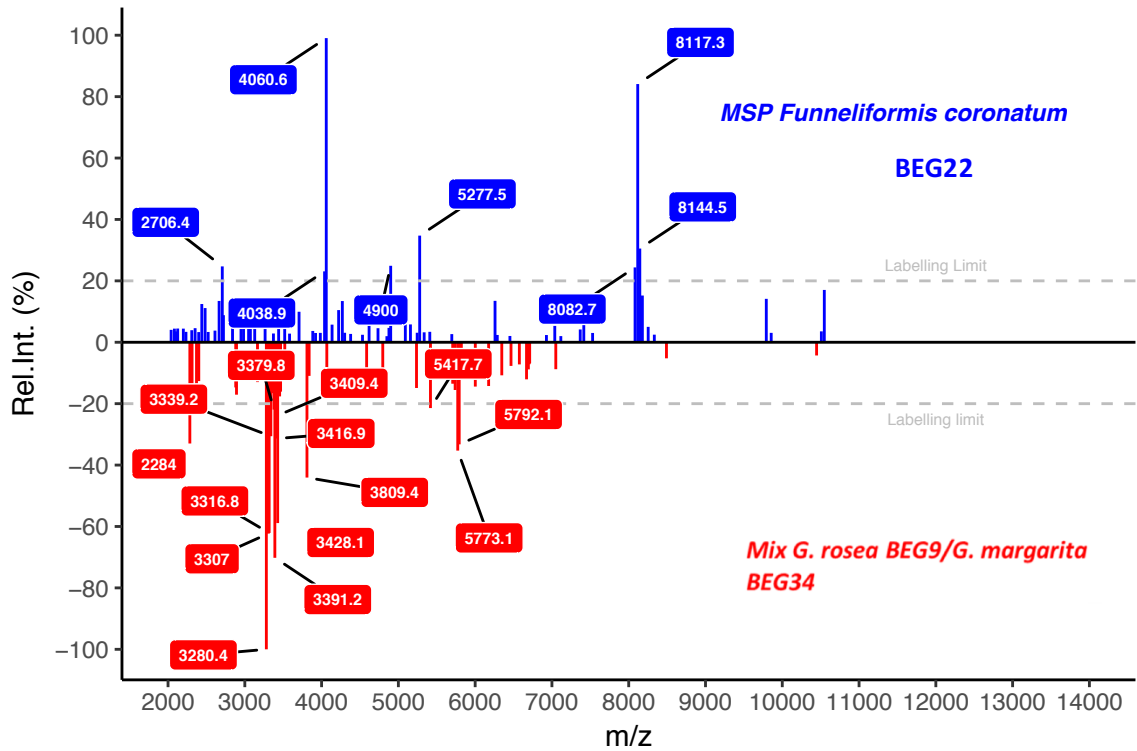

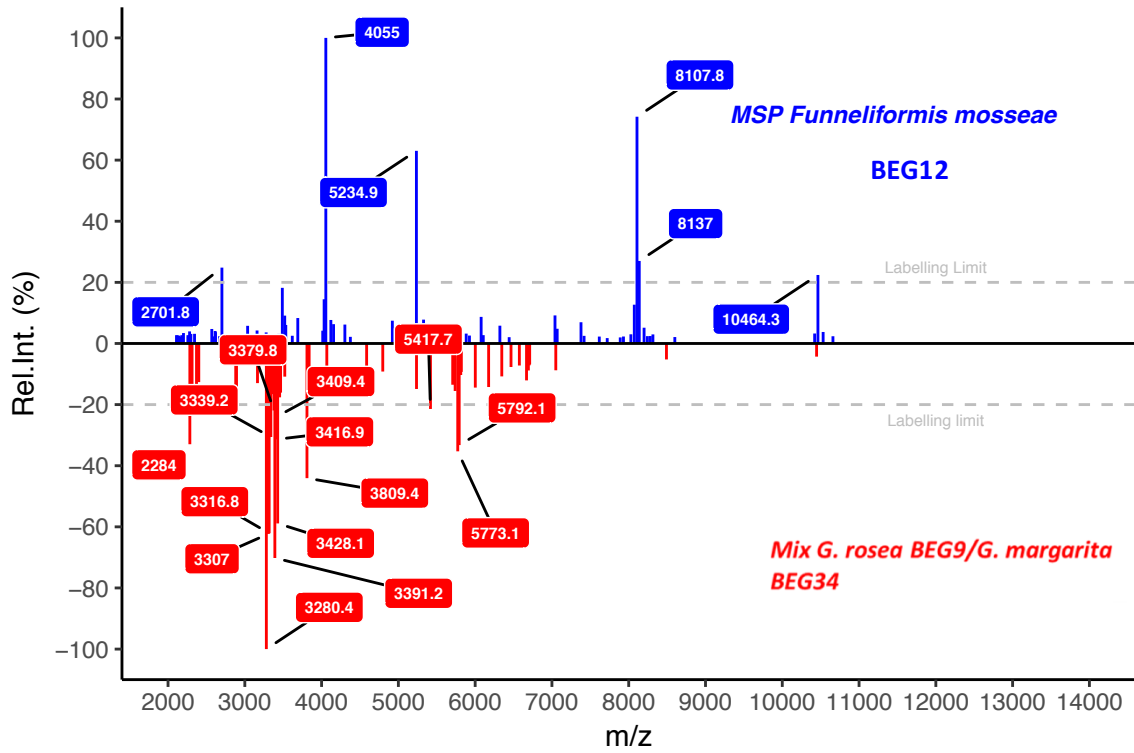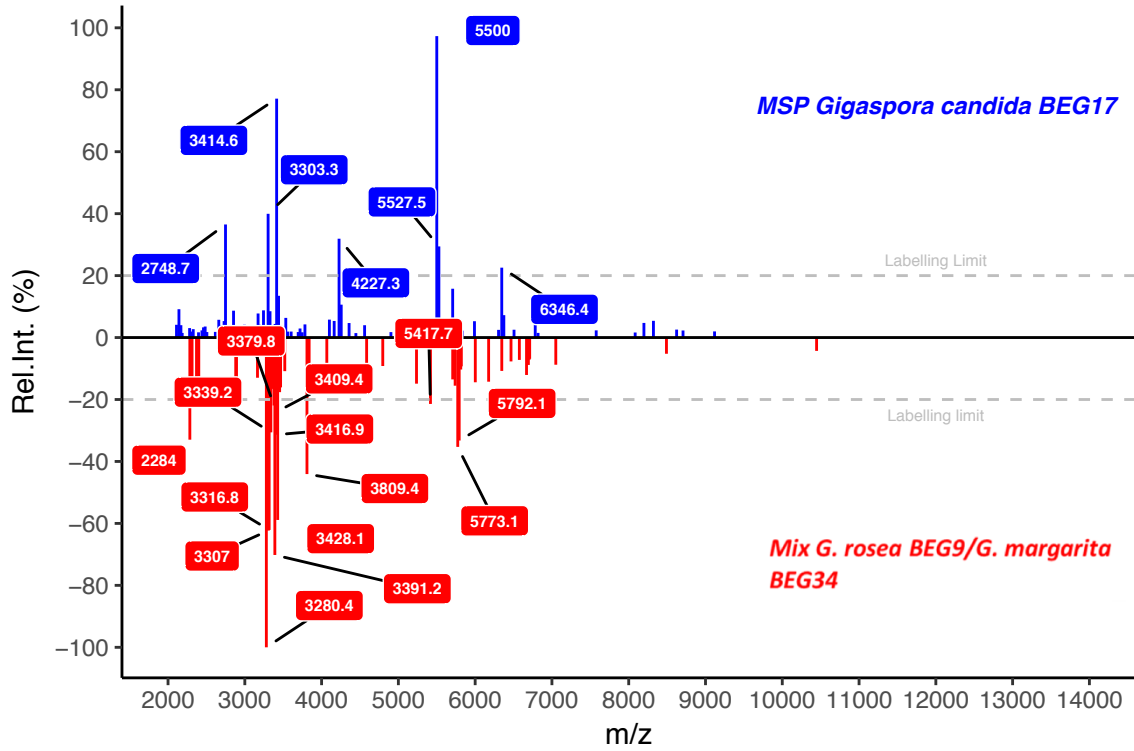

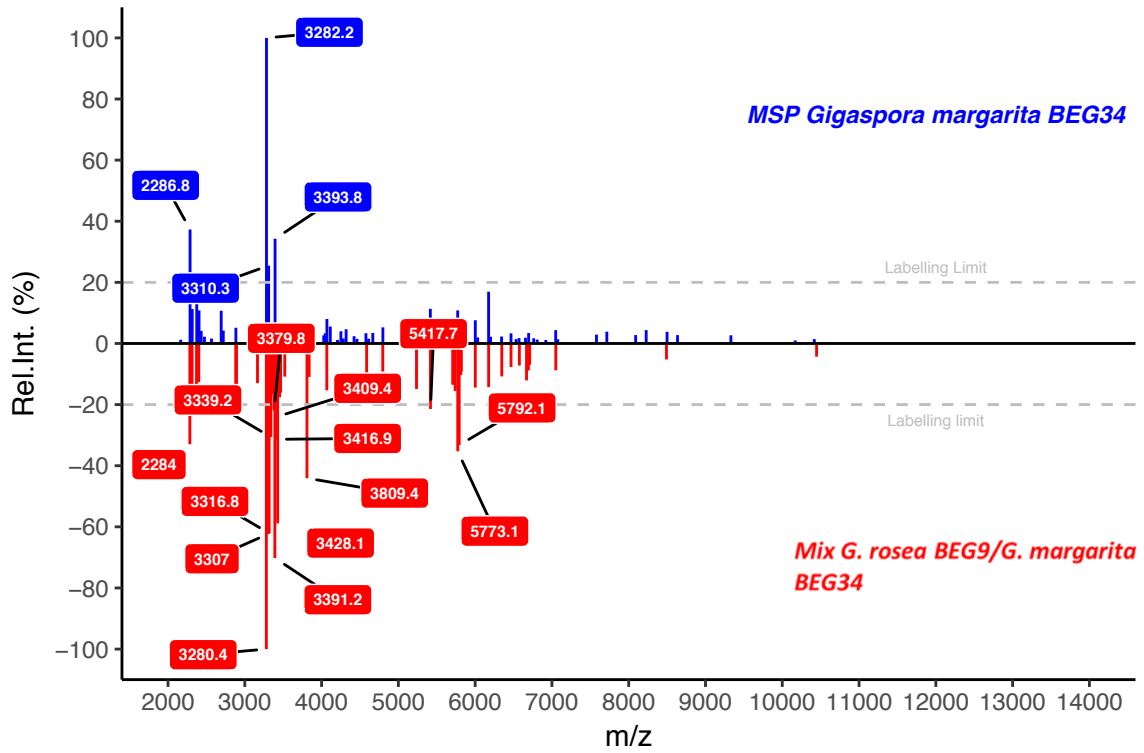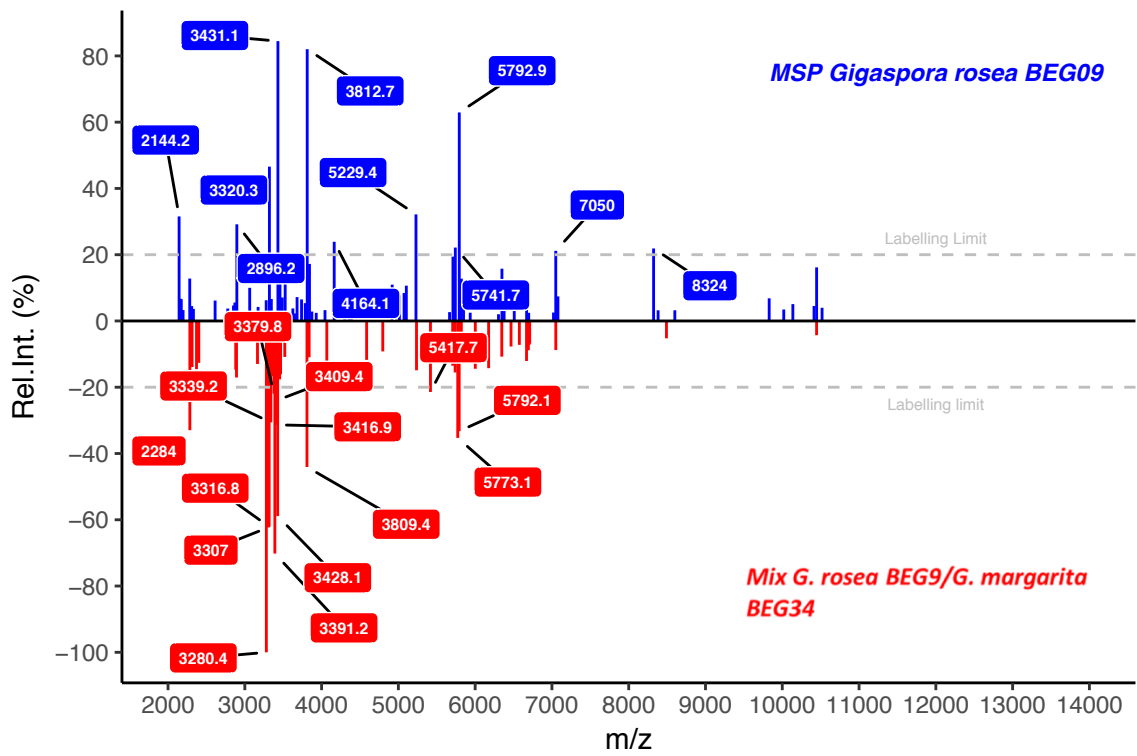

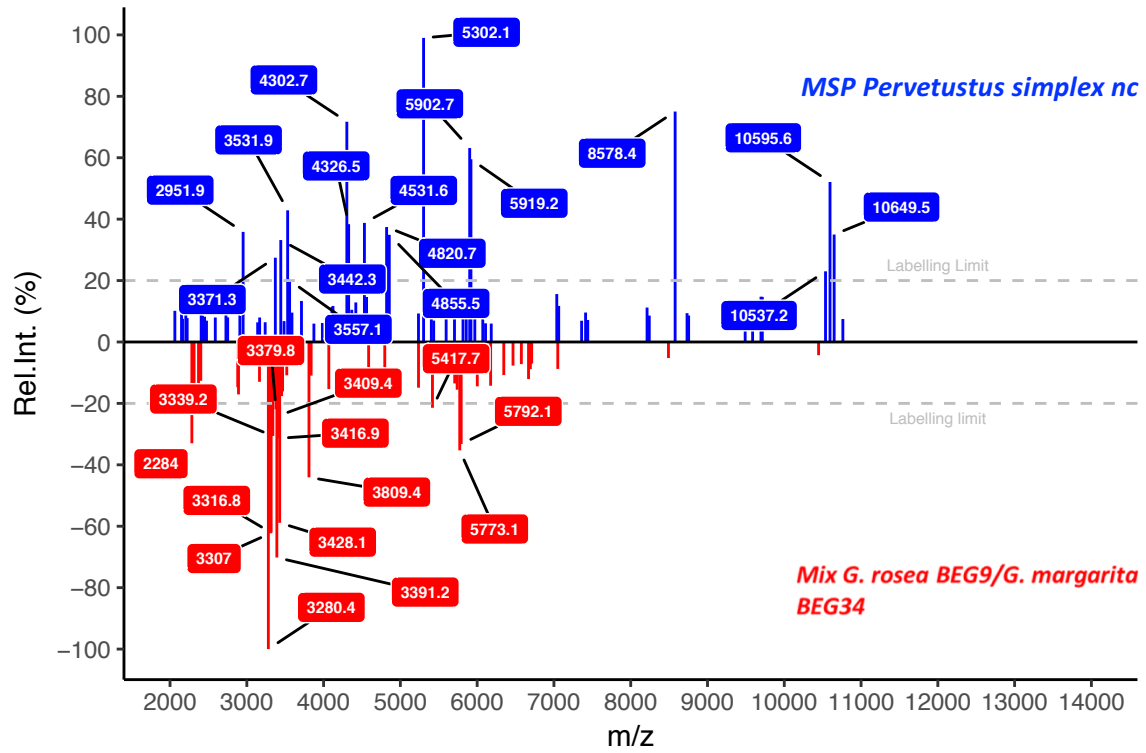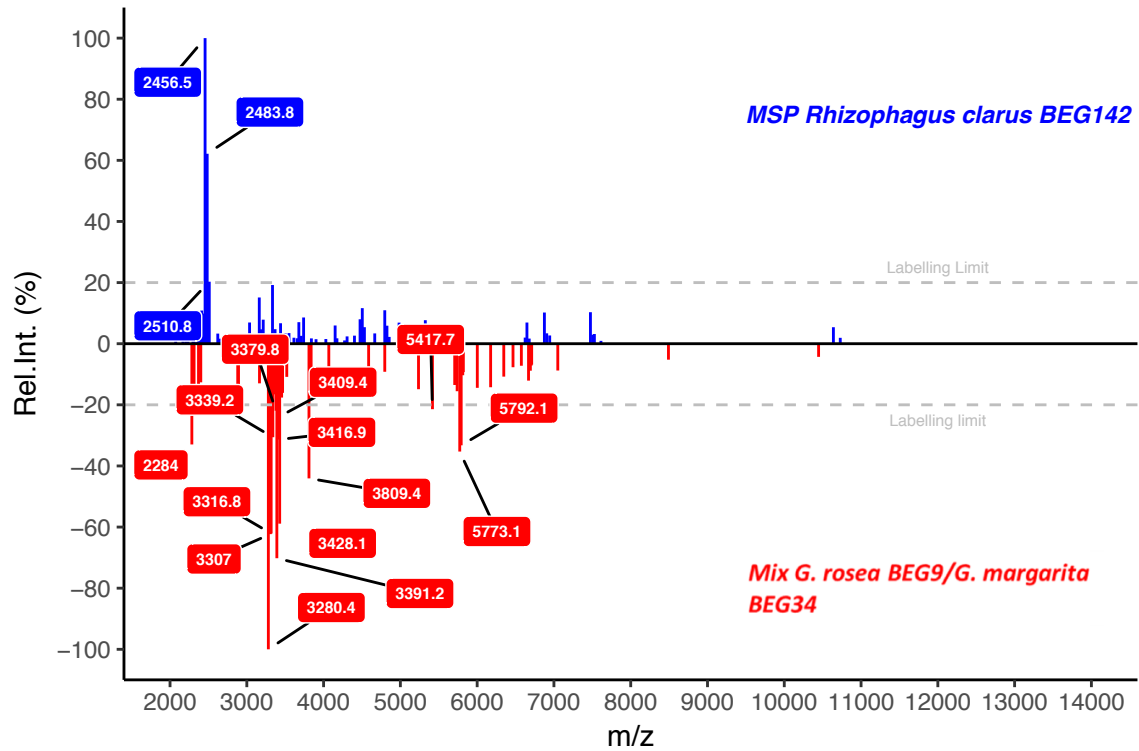

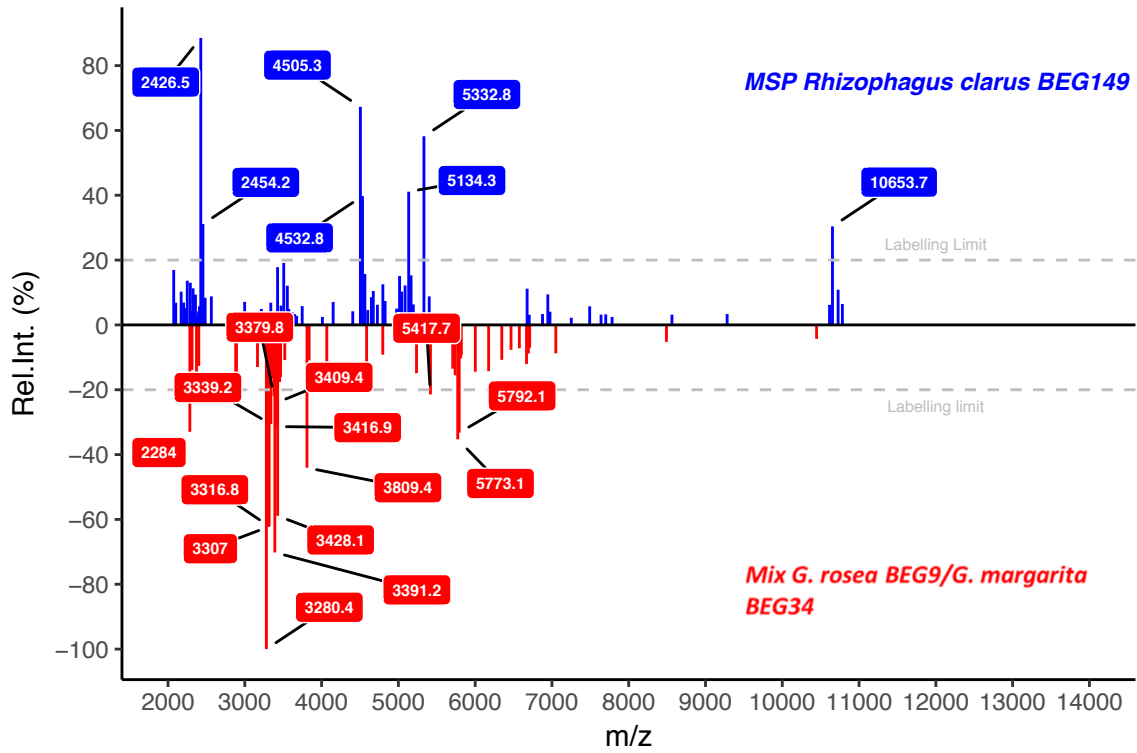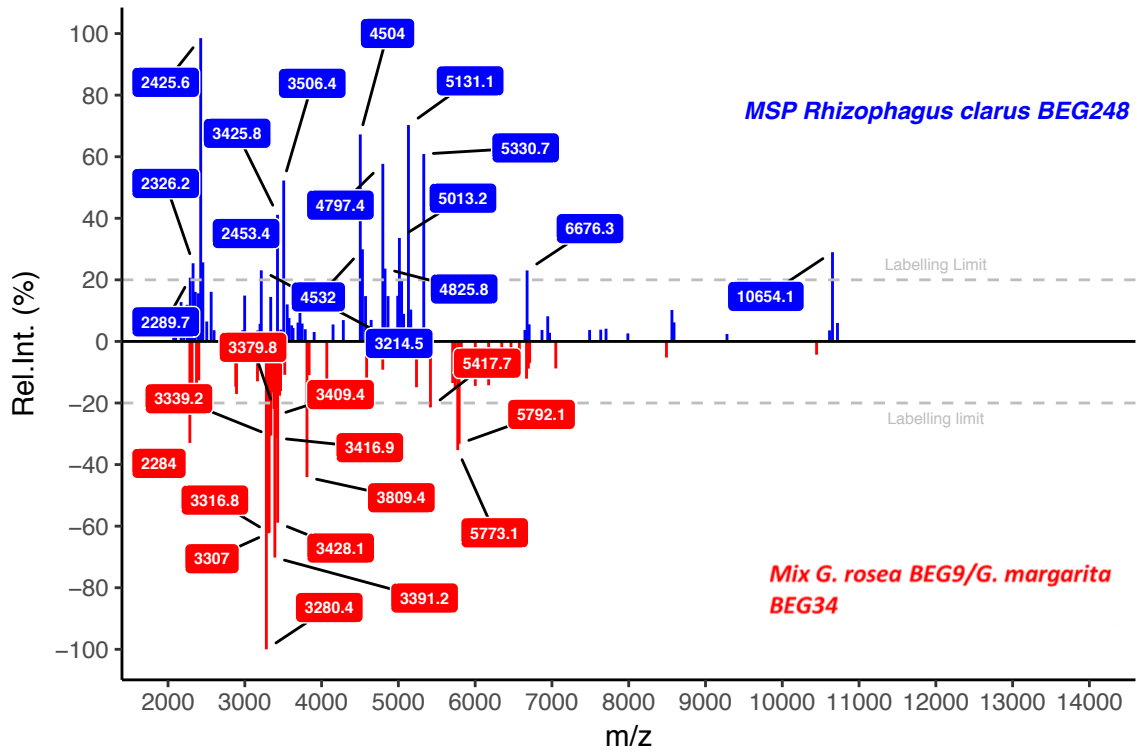



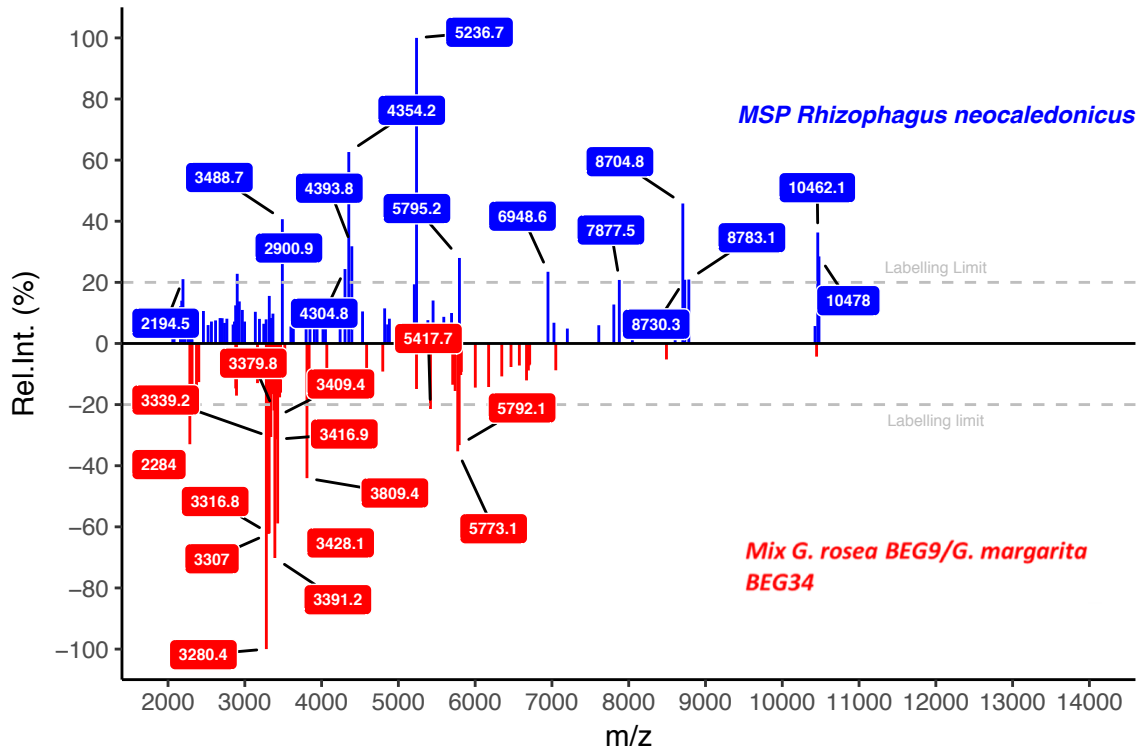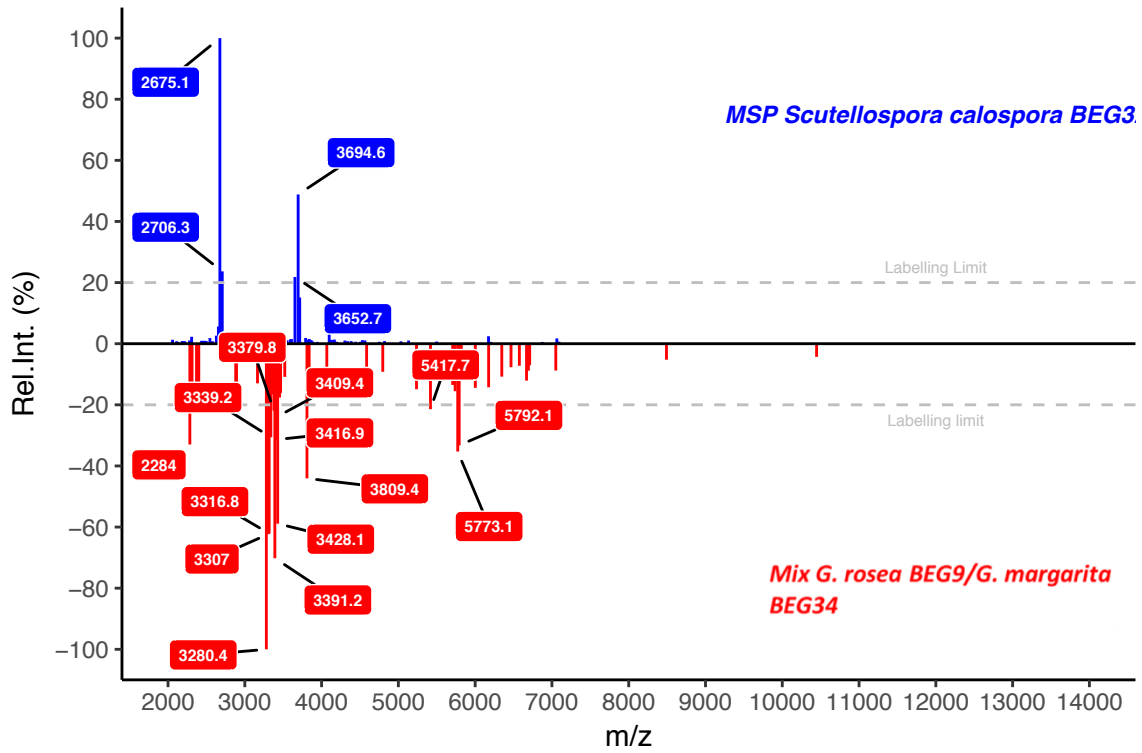

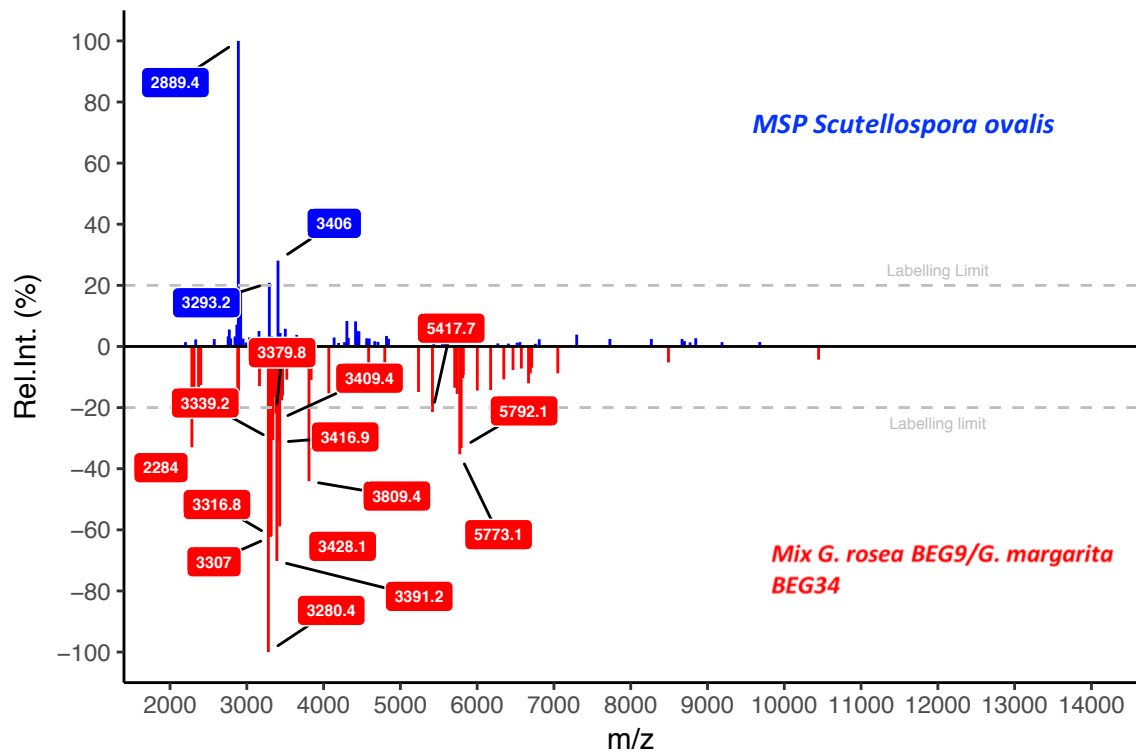

**Supplementary Figure 4.** Example of using the R (version 3.3.2<sup>30</sup>) MSP importation data base on a mixed-species sample. The “unknown sample” (red; 1 spore of *G. margarita* BEG34/ 1 spore of *G. rosea* BEG9) is matched to MSP reference spectra (blue).
